# Supplementary material
Source: publisher figshare collection journal article supplement (https://gsapubs.figshare.com/ndownloader/files/31330222)
Supplement: Supplementary file 1 [file 31330222]

## Sheet: Table S2. CB_WR_All data
Sample	Unit	SiO2	TiO2	Al2O3	FeO	MgO	MnO	CaO	Na2O	K2O	P2O5	Total		Ba	Rb	Sr	Zr	Y	Nb	Ta	Hf	Ni	Cr	V	Co	Cs	Pb	Th	U	La	Ce	Pr	Nd	Sm	Eu	Gd	Tb	Dy	Ho	Er	Tm	Yb	Lu	Sc	Ti	Eu/Eu*	{87}Sr/{86}Sr	O18	DyN
CBV06	Postcaldera	76.0587	0.0758957	13.3033	0.575646	0.0974336	0.0820494	0.616396	4.44502	4.72297	0.0225636	100		38	376	17	55	34	44			5	3	12	60
CBV02	Postcaldera	76.4335	0.0778894	13.0774	0.670001	0.116834	0.0828823	0.60614	4.23699	4.67636	0.0219688	100		63	378	14	56	34	45	4.7		7	2	8	36	28.2	35	32.5	24.8	21.4	42.2	4.72	15.9	3.14	0.23	2.91	0.46	2.65	0.56	1.87	0.3	2.29	0.36			0.232198	0.706792		10.4331
PFSICALD.	Postcaldera	75.5916	0.0714187	13.6206	0.666764	0.45912	0.0816214	0.601958	4.23411	4.64222	0.030608	100		64	390	14	53	34	46	4.82257		0	1	6	29	28.4472	36.1118	31.5093	27.3554	19.8568	38.8988	4.69356	16.0878	2.87569	0.155064	2.68018	0.441981	2.85663	0.60058	1.83318	0.255703	2.26438	0.342618			0.170451			11.2466
O3Int.Cald.	Postcaldera	76.4205	0.0810828	13.0645	0.744527	0.364873	0.0810828	0.56758	4.10482	4.54064	0.030406	100		23	357	14	51	33	82	4.71777		2	0	10	45	25.6008	33.8534	29.1995	24.7497	22.6987	42.4966	4.92897	16.411	2.7906	0.141019	2.49716	0.407312	2.51239	0.523635	1.67337	0.221152	2.12742	0.310691			0.163023			9.8913
DOMO01	Postcaldera	75.8941	0.0700407	13.4178	0.622231	0.450262	0.0800465	0.620361	4.21245	4.60268	0.0300174	100		12	378	15	54	33	45	4.7		5	3	10	47	28.3	35	33.3	25	19.2	37.7	4.32	14.7	2.98	0.22	2.72	0.46	2.68	0.55	1.86	0.31	2.3	0.36			0.235815	0.706799		10.5512
DOMO03	Postcaldera	76.0638	0.070355	13.277	0.68892	0.381927	0.0804057	0.613093	4.16099	4.64343	0.0201014	100		37	372	17	53	33	44			3	3	7	56
DOMO04	Postcaldera	75.9948	0.079858	13.3063	0.666666	0.419254	0.079858	0.598935	4.23247	4.59183	0.0299467	100		3	381	15	55	33	46			0	5	7	42
BLSBDOMO	Postcaldera	76.1509	0.080201	13.1931	0.711132	0.401005	0.080201	0.591483	4.1905	4.57146	0.0300754	100		60	379	13	54	35	45			0	4	9	34
D2CBL	Postcaldera	76.0692	0.0908832	13.1983	0.644492	0.353435	0.080785	0.555397	4.41288	4.57445	0.0201963	100		8	355	13	53	33	83			0	4	11	47
CBL02Bis	Postcaldera	76.3689	0.081071	13.0322	0.677846	0.344552	0.081071	0.597899	4.14476	4.65145	0.0202678	100		46	371	18	51	28	73			2	1	9	39
CB44	Postcaldera	76.1009	0.0708763	13.102	0.611164	0.101252	0.0810015	0.648012	4.61709	4.64746	0.0202504	100		26	380	21	51	29	41	4.40658		4	6	12	31	28.3727	34.0836	28.2335	26.912	16.6897	31.2483	3.39861	10.9241	1.69611	0.087691	1.61368	0.243597	1.69446	0.373417	1.26359	0.177315	1.81845	0.284392			0.161756	0.706839		6.67112
CB32	Postcaldera	76.3408	0.0811057	13.1594	0.655622	0.202764	0.0811057	0.689399	4.13639	4.63316	0.0202764	100		49	377	15	56	33	45			0	2	12	30
CB33	Postcaldera	76.5472	0.0716064	13.1551	0.600089	0.184131	0.0818359	0.623999	4.07134	4.64419	0.020459	100		72	376	21	50	29	39	4		4	0	4	40	29.8	35	29.2	25.5	18.7	34.2	3.59	11.4	1.9	0.2	1.87	0.3	1.71	0.38	1.33	0.23	1.89	0.31			0.323798			6.73228
CB36A	Postcaldera	76.2193	0.0718566	13.2627	0.622331	0.205305	0.0821218	0.708301	4.13689	4.67068	0.0205305	100		19	371	15	56	33	44	4.81856		4	2	17	76	27.495	35.809	32.1852	26.2031	19.1802	37.3811	4.39912	15.09	2.68644	0.143263	2.54725	0.409785	2.69544	0.531827	1.71064	0.234643	2.19189	0.316519			0.167129			10.612
CB36B	Postcaldera	76.2117	0.0718881	13.3404	0.588988	0.205395	0.0821579	0.616184	4.16951	4.69327	0.0205395	100		24	372	14	58	33	45	4.6		2	3	15	73	27.9	35	32	24.3	19.5	38.6	4.35	14.7	3.01	0.27	2.79	0.46	2.61	0.55	1.82	0.3	2.27	0.36			0.284328			10.2756
CB07-13	Postcaldera	76.1392	0.112451	13.1436	0.727985	0.259282	0.0797791	1.6255	4.25821		0.0240186	100		32	337	101	86	45	46					9			35																					8.55
CB07-12A	Postcaldera	76.8267	0.0916459	12.9323	0.51127	0.162926	0.074335	0.593662	4.73809	4.05177	0.0173109	100		24	338	10	76	44	48					11			35
CB07-12B	Postcaldera	76.6839	0.0918597	13.069	0.579954	0.153099	0.0791894	0.599953	4.62963	4.09968	0.0137262	100		15	360	9	75	47	50					9			38																					8.35
CB07-6	Postcaldera	76.7534	0.0851049	12.9896	0.566125	0.142855	0.0688944	0.61701	4.70002	4.06173	0.0151973	100			338	9	74	41	50								37																					8.2
CB07-7	Postcaldera	76.8153	0.0886884	12.9006	0.528343	0.197765	0.0795137	0.722759	4.66684	3.98384	0.0163105	100		13	355	17	67	42	46								35
CB07-8	Postcaldera	69.5262	0.430159	15.1892	2.65986	1.38992	0.0699962	2.63986		3.80979	0.175211	100		509	221	524	205	36	18					44			27																					8.47
Pomez02	CBI	75.8405	0.0923632	13.0848	0.822407	0.482341	0.0821007	0.626018	4.39239	4.54632	0.0307877	100		62	348	28	53	32	79	4.6		4	5	7	106	28	33	30.4	24.7	18.5	36.9	4.15	14.3	2.9	0.23	2.8	0.46	2.72	0.56	1.83	0.3	2.28	0.37			0.246315			10.7087
Pomez01	CBI	76.1903	0.081925	12.9749	0.655666	0.389144	0.0921657	0.563235	4.38299	4.64925	0.0204813	100		13	366	14	52	33	85	4.7		1	6	8	98	28.7	34	29.1	24.5	18.7	37.2	4.24	14.7	3.06	0.22	2.84	0.47	2.74	0.57	1.87	0.31	2.29	0.36			0.227743			10.7874
PV3	CBI	75.3883	0.0812921	13.2913	0.600064	0.518237	0.0812921	0.609691	4.76575	4.62349	0.0406461	100		72	384	15	54	35	48	4.8		2	2	16	94	28.6	33	30.3	25	18.6	37.2	4.31	14.9	3	0.22	2.8	0.46	2.82	0.58	1.89	0.32	2.45	0.39			0.231646			11.1024
CB20D	CBI	76.2408	0.0831756	13.1521	0.677966	0.145557	0.0831756	0.873344	4.13798	4.58505	0.0207939	100		70	386	21	56	34	48	6.8789		6	6	8	57	37.8025	48.3361	40.854	36.344	23.5238	47.2899	5.60098	19.3369	3.79032	0.155499	3.4444	0.567384	3.65704	0.744299	2.3891	0.315342	3.00144	0.435786			0.131333	0.706958		14.3978
ECA	CBI	76.3358	0.0830414	12.9856	0.589027	0.352926	0.0830414	0.57091	4.31815	4.6607	0.0207604	100		61	364	16	52	32	83	4.5		3	2	12	76	28.3	34	28.9	24	17.3	34.9	3.99	13.7	2.81	0.22	2.72	0.45	2.64	0.53	1.77	0.29	2.22	0.35			0.242844			10.3937
CB35	CBI	75.683	0.0724536	13.2487	0.655712	0.186309	0.0828042	0.631382	4.80264	4.61633	0.020701	100		30	372	17	59	35	44	8.22203		7	3	12	67	44.6467	61.0162	52.1698	44.4692	30.4305	60.1847	7.0013	24.4827	4.70509	0.236588	4.36091	0.687527	4.38321	0.897499	2.95278	0.377745	3.54294	0.514789			0.15939	0.707407		17.2567
113 Vir	CBI	75.583	0.0718938	13.1617	0.876883	0.445742	0.0975702	0.816509	4.27152	4.61456	0.0605962	100		86	365	3	75	35	51			5	5	12	99					18.8	37.2	4.2	14.4	2.86	0.22	2.71	0.45	2.57	0.52	1.82	0.29	2.21	0.36			0.241155			10.1181
CPP402	CBI	76.7498	0.103801	12.8194	0.818882	0.124561	0.0830407	0.664325	4.01709	4.60876	0.0103801	100
PU36	CBI	75.559	0.695906	12.9833	0.738615	0.166187	0.0830933	0.706293	4.30008	4.7467	0.0207733	100
PU36	CBI	76.3019	0.0725381	12.974	0.921129	0.145076	0.0932632	0.652843	4.21757	4.60099	0.0207252	100
PU44	CBI	76.0385	0.0622825	13.1624	0.657434	0.114185	0.0830434	0.653967	4.47396	4.73347	0.0207608	100
PU44	CBI	75.7902	0.0728341	13.0997	0.809277	0.114454	0.0936439	0.697126	4.4845	4.63017	0.021	100
CPP31	CBI	75.9903	0.0621596	12.9499	0.679159	0.372958	0.0932394	0.663036	4.46513	4.70341	0.0207199	100
CPP312	CBI	75.2196	0.0823687	14.569	0.594891	0.0720726	0.0720726	0.586877	4.18021	4.62294	0.021	100
EM50	CBI	76.0215	0.0721658	13.1857	0.813306	0.113403	0.0824752	0.649492	4.26809	4.77325	0.0206188	100
PU48	CBI	76.3076	0.0831192	12.9562	0.761934	0.207798	0.0831192	1.12211	3.93777	4.5196	0.0207798	100
504 A	CBI	77.0314	0.083337	12.9693	0.717632	0.083337	0.0937541	0.593776	3.88559	4.54186		100
EM52	CBI	76.0794	0.0824177	13.0941	0.709716	0.154533	0.0824177	0.731458	4.37844	4.6566	0.0309067	100
CB07-5	CBI	77.1249	0.094705	12.8953	0.381618	0.142058	0.0782346	0.604259	4.61275	4.04864	0.0174998	100		16	318	9	70	33	48								34																					8.68
CB07-10	CBI	75.8962	0.094713	12.6777	0.619887	0.239956	0.0827378	0.589893	4.63916	5.13907	0.0206844	100		17	333	14	72	38	50								34																					8.4
Purulla 2018	CBI	76.8257	0.0813282	12.9327	0.540389	0.0847856	0.131312	0.583954	4.19563	4.61765	0.00656727	100		11.18	371.927	12.4307	64.009	19.6487	51.3277	4.96487	3.61697	1.7525	7.168	2.20425		30.5864	35.4898	31.528	22.6125	18.558	39.4029	4.44196	14.9919	3.15018	0.22747	2.69587	0.479284	2.9905	0.624603	1.96296	0.327638	2.28518	0.391569			0.238204			11.7736
CB07010	CBI	75.4265	0.0798313	12.6787	0.546808	0.0827386	0.260044	0.585293	5.70993	4.62382	0.00631957	100		9.628	354.147	11.6537	60.6325	18.018	48.1903	4.62184	3.37742	3.20875	10.86	3.704		28.7961	32.3388	29.0317	22.572	17.972	37.4681	4.21296	14.033	2.97167	0.221807	2.49467	0.445433	2.76133	0.5829	1.74471	0.302573	2.12561	0.355922			0.248605			10.8714
CPP18001	CBI	76.726	0.0915922	13.0482	0.617181	0.0822532	0.0897283	0.622535	4.08945	4.62327	0.00979176	100		32.308	359.579	18.124	65.9152	18.565	48.041	4.63927	3.36785	1.7275	11.6537	5.187		28.9798	33.2287	30.513	22.7535	18.1534	37.9031	4.27257	14.2306	3.02877	0.203291	2.55146	0.440824	2.77379	0.577085	1.75773	0.308193	2.13338	0.35749			0.223169			10.9204
L.Pur2	CPPI	73.0064	0.171211	14.5832	1.53352	0.513633	0.0906411	1.37976	4.09899	4.5522	0.0704987	100		574	170	418	155	34	51			0	2	15	16
P.N.	CPPI	72.1702	0.288991	14.2935	2.05662	0.61898	0.0579981	1.74294	4.04387	4.62385	0.102997	100		734	154	524	203	24	29	2.1		0	0	16	43	6.14	22	23	6.4	54	92	9.4	30.8	4.55	1.01	4.17	0.53	2.7	0.52	1.53	0.21	1.5	0.21			0.707603			10.6299
P.B.D.D.	CPPI	73.519	0.2556	13.6049	1.68286	0.52423	0.0581364	1.43036	3.91418	4.91954	0.091214	100		592	167	389	197	24	31	2.3		2	1	26	100	6.64	22	24.4	6.92	54.3	94.3	9.63	31.9	4.8	0.97	4.28	0.57	2.86	0.55	1.62	0.23	1.58	0.24			0.653087			11.2598
P.B.L.	CPPI	73.6341	0.265674	13.402	1.78454	0.526335	0.0611551	1.4597	3.87182	4.90845	0.0862186	100		668	171	410	203	26	32			0	3	34	34
P.BE.	CPPI	73.0877	0.279216	13.9397	1.87931	0.596597	0.0582536	1.46337	3.79753	4.79588	0.102446	100		647	172	428	214	24	33			0	2	22	57
CBV12A.	CPPI	73.946	0.225738	13.6874	1.68745	0.456514	0.0554267	1.23753	3.64909	4.96623	0.0886827	100		486	175	288	206	28	25	2.967		2	2	29	40	7.31906	16.3794	29.2708	8.16601	54.0227	86.1106	10.2145	33.5399	4.79548	0.939726	3.95616	0.542059	3.0048	0.550737	1.5594	0.181198	1.53752	0.200683			0.6584	0.706626		11.8299
CBV12B.	CPPI	73.6012	0.206709	13.6277	1.7382	0.443521	0.043148	1.35264	3.80505	5.09648	0.0852925	100		547	175	300	172	26	22			4	1	26	26
CB6.	CPPI	74.2765	0.201166	13.5686	1.55346	0.402331	0.0502914	1.21705	3.67127	4.97885	0.0804663	100		542	174	282	179	27	25	2.78907		0	0	24	95	6.24404	19.5365	25.3785	7.67163	44.95	74.0974	8.37069	27.424	3.88387	0.787498	3.18503	0.446735	2.49313	0.463087	1.30537	0.140319	1.30582	0.159262			0.683284	0.706628	8.12	9.81547
C.Pomez01	CPPI	71.9585	0.281229	14.5335	2.09808	0.753292	0.0602633	1.61707	3.90707	4.68045	0.110483	lascar93		721	152	498	186	24	36	2.1		0	0	34	38	5.98	20	22.8	6.28	52.5	90	9.21	30.2	4.55	1.06	4.01	0.54	2.69	0.52	1.55	0.23	1.5	0.22			0.757303	0.706615		10.5906
P.Negra	CPPI	71.806	0.269815	14.4201	2.1319	0.75948	0.0599589	1.5989	4.05722	4.78672	0.109925	100		655	159	438	177	25	40			0	0	24	58
CPP125	CPPI	72.6332	0.244599	13.5039	1.85716	0.397473	0.0509581	1.38606	5.00409	4.84102	0.081533	100
CPP301A	CPPI	74.2233	0.215033	13.5164	1.5701	0.430066	0.061438	1.32092	3.94227	4.64881	0.0716776	100
CPP301B	CPPI	71.1186	0.321041	13.8449	2.9875	0.983187	0.0802602	2.22722	3.88259	4.47451	0.0802602	100
CPP301C	CPPI	74.2685	0.251677	12.7852	1.71142	0.402683	0.0503354	1.40939	3.98656	5.07381	0.0604025	100
CPP301D	CPPI	56.4764	1.40496	16.9808	7.58081	3.48714	0.121292	5.76135	4.31596	3.40627	0.464951	100
CPP112	CPPI	54.7996	1.53075	16.9973	8.4822	3.60821	0.198799	6.8884	4.07539	2.93229	0.487058	100
CPP1	CPPI Barranca Blanca	71.0729	0.334729	13.8427	2.69946		0.075584	2.07316			0.118775	100
CPP3	CPPI Barranca Blanca	68.3043	0.427099	14.063	3.50711	1.60423	0.0729194	2.94803	3.76056	5.12519	0.187507	100
CPP39B	CPPI	60.7415	0.905292	16.3455	6.82888	2.89693	0.110647	4.59687	3.76199	3.57087	0.241411	100
CPP314b	CPPI	72.5752	0.264788	14.156	1.9237	0.478655	0.0509208	1.52762	4.01256	4.96987	0.0407366	100
CB07-02A	CPPI Barranca Blanca	73.0973	0.20002		1.36014		0.040004		3.75038	5.27053	0.050005	100															14
CB07-02B	CPPI Barranca Blanca													277	96	204	40	19	3					21			7																					7.63
CB07-11	CPPI	73.739	0.259961	13.7579	1.47978	0.549918	0.0549116	1.42979	4.93926		0.0799881	100		599	204	267	185	42	26					9			22																					8.36
CB0703	CPPI	72.7874	0.271786	14.393	1.57816		0.418674	1.44442	3.94748	5.01463	0.0824062	100		826.426	170.476	297.304	191.563	16.109	28.5282	2.3888	5.29135	2.1445	6.58325	17.4045		6.84619	21.4447	24.6382	7.23275	59.7723	104.703	10.5389	33.7336	5.1631	1.07535	3.68091	0.559078	3.13282	0.593309	1.6109	0.23984	1.51582	0.242256			0.752762	0.706626	8.34	12.334
CPP16001	CPPI Basal Pumice Fall	73.6716	0.242753	12.9852	1.39994	0.0623749	0.404386	1.07298	4.91367	5.17907	0.0679904	100		485.506	167.186	172.178	155.776	15.76	27.4815	1.58	2.97	1.23125	3.8415	12.7065		11.28	22.4087	24.4772	6.895	40.72	70.28	7.04	22.19	3.47	0.62	2.39	0.36	2.03	0.39	1.06	0.15	1.03	0.15						7.99213
Purulla 2011	CPPI	74.2305	0.221018	13.754	1.33032		0.339545	1.38087	3.67856	4.94449	0.0674613	100		626.03	170.769	251.469	154.81	15.4117	26.932	2.40013	4.51503	1.49525	6.43475	12.12		7.05966	18.8535	25.286	7.28275	55.449	96.8781	9.70221	30.9793	4.96237	0.959432	3.42377	0.539152	3.00511	0.554266	1.55078	0.232488	1.47931	0.228436			0.710328			11.8311
CPP-16-11B**	Bardelli	74.0482	0.249153	13.7034	1.47499	0.378712	0.0498306	1.40522	3.81702	4.7937	0.0797289	100
CPP-16-11A**	Bardelli	74.1564	0.242473	13.6896	1.43463	0.36371	0.0505153	1.37401	3.77854	4.82926	0.0808244	100
P.B.D.D**	Bardelli	73.5755	0.263131	13.7334	1.37638	0.526263	0.0607226	1.44722	3.95709	4.96913	0.0910839	100
CPP-PB-PRX**	Bardelli	74.0615	0.236553	13.9566	1.34732	0.359971	0.0617093	1.25476	3.63057	5.00874	0.0822791	100
P.N.**	Bardelli	72.4626	0.291135	14.3459	1.67654	0.622427	0.0602349	1.74681	4.05582	4.63809	0.100392	100
PB**	Bardelli	69.0008	0.481163	14.8342	2.84603	1.8018	0.0716626	2.71294	3.91073	4.3407		100
PBM**	Bardelli	69.4125	0.501777	14.6352	2.77023	1.53669	0.0731758	2.67614	3.89923	4.31737	0.177713	100
PN2**	Bardelli	57.0322	1.22883	16.2743	6.98059	5.39033	0.123916	6.65014	3.49029	2.82941		100
PN1**	Bardelli	56.7745	1.13341	14.8175	7.1332	6.91484	0.145576	7.06041	3.05709	2.66195	0.301549	100
DD2**	Bardelli	55.5009	1.53657	17.7832	7.12969	4.06679	0.133169	7.06822	4.01557	2.76583		100
DD1**	Bardelli	57.2438	1.51439	16.8097	6.65321	3.88693	0.131247	6.80464	3.78597	2.66532	0.504796	100
CPP112**	Bardelli	55.9075	1.54852	17.1946	6.94822	3.65008	0.201106	6.96833	4.12267	2.96631	0.49271	100
DV2**	Bardelli	55.7744	1.45138	18.5362	7.04955	3.43147	0.134771	6.22019	4.13643	3.2656		100
DV1**	Bardelli	55.8091	1.46266	18.2054	6.90871	3.34025	0.134855	6.29668	4.01452	3.14315	0.684647	100
Sia973b3	Siebel et al 2001	68.4155	0.366212	14.5855	2.28544	1.11228	0.0556138	5.40399	3.74606	3.90346	0.125918	100		335	146	301	122	10	29	2.3		1.6			1.7	7.2	19	27	6.8	34	59	6.5	20	3.2	0.67	2.4	0.34	1.9	0.37	1.1	0.18	1.1	0.19				0.706693
CBV05	Pre-CPPI	76.4781	0.0682473	13.2199	0.671135	0.116422	0.07728	0.626269	4.17513	4.54346	0.0240873	100		58	365	19	50	29	41	5.08958		5	6	13	31	28.938	36.4788	29.6558	27.5734	16.9536	31.8172	3.46341	10.9498	1.85897	0.101609	1.63072	0.250698	1.73977	0.367973	1.31739	0.186192	1.86917	0.28608			0.178093			6.84948
CB44	Pre-CPPI (SE)	76.1009	0.0708763	13.102	0.611164	0.101252	0.0810015	0.648012	4.61709	4.64746	0.0202504	100		26	380	21	51	29	41	4.40658		4	6	12	31	28.3727	34.0836	28.2335	26.912	16.6897	31.2483	3.39861	10.9241	1.69611	0.087691	1.61368	0.243597	1.69446	0.373417	1.26359	0.177315	1.81845	0.284392			0.161756	0.706839		6.67112
CBV04	Pre-CPPI	73.1943	0.216415	14.1726	1.65849	0.549755	0.0512831	1.68414	3.66469	4.69035	0.117951	100		277	222	344	143	23	20			n/d	2	29	28
CBV10	Pre-CPPI	76.5881	0.0663799	13.2392	0.595637	0.10825	0.0776134	0.638268	4.01956	4.64353	0.0234883	100		50	374	21	50	29	40	4.1		4	1	15	42	30	35	30.7	26.1	18.4	33.9	3.55	11.3	1.91	0.19	1.85	0.3	1.7	0.4	1.39	0.24	1.95	0.33			0.308456			6.69291
CBV14	Pre-CPPI	76.3692	0.0676835	13.3448	0.568928	0.0888977	0.0757651	0.643498	4.16102	4.66006	0.020204	100		51	380	21	52	30	40	4.1		3	4	13	26	29.6	35	28.7	25.5	18.8	34.5	3.6	11.5	1.96	0.19	1.88	0.3	1.71	0.38	1.39	0.24	1.93	0.32			0.302057			6.73228
C. De Purulla	Cueros de Purulla	72.9776	0.174	14.6593	1.59016	0.540106	0.0794569	1.46442	3.98793	4.45361	0.0734222	100		530	168	415	164	34	48			n/d	4	21	44
C. De Purulla	Siebel et al 2001	73.5923	0.179617	14.551	1.27144	0.25227	0.0827447	1.55399	3.9556	4.5106	0.0504541	100		651	179	277	147	22	31	2.4		1			0.8	7.9	24	21	5.9	55	10	12	37	6.6	1.2	5.1	0.49	4.4	0.78	2.2	0.34	2.2	0.33				0.707978
C.Chascon	Chascon	72.8425	0.371809	14.6503	1.54083	0.509479	0.0884304	1.3556	4.08488	4.48784	0.0683326	100		553	168	405	156	35	52			n/d	9	13	33
LH-25*	Aguada Alumbrera	71.2491	0.408538	14.4623	2.77806	1.02135	0.0306404	2.36952	3.30916	4.25901	0.112348	100		585.3	132.2	388.3	133.2	12.6	16.8	1.4	3.7	13	2	46		7.1	1.2	19.6	4.3	33.7	68	7	23.4	3.7	0.7	2.4	0.4	1.8	0.4	1.1	0.2	1.2	0.2			0.7			7.08661
C5-18*	Aguada Alumbrera	71.3909	0.345178	15.066	2.62944	0.456853	0.0203046	2.22335	3.51269	4.2335	0.121827	100		781	141.3	331.4	129.7	11.4	11.1	0.8	3.4	20	7	34		79.6	8.9	13.2	2.9	31.3	62.6	6.1	20.2	3.4	0.8	2.4	0.4	1.7	0.3	0.9	0.1	0.9	0.1			0.83			6.69291
SB-05*	Aguada Alumbrera	73.4308	0.276017	14.9254	2.12635	0.470251	0.0204457	1.26763	2.42282	4.98875	0.07156	100		795.4	166	222.3	125.8	11.6	10.3	0.8	3.6	10	13	25		17.7	6.1	15.8	2.6	32.9	64.5	6.5	21	3.3	0.7	2.3	0.4	1.8	0.3	1	0.2	1	0.2			0.77			7.08661
Pu-14*	Rosada	68.6314	0.49455	14.9273	3.44166	1.46346	0.0605571	2.97739	3.92612	3.90593	0.171579	100		675	139.7	461.9	155.3	18.3	18.7	1.5	4.4	12		63		4.7	1.2	19.3	5	41	82.4	8.5	29	4.7	0.9	3.4	0.6	2.6	0.5	1.5	0.2	1.6	0.2			0.69			10.2362
CGI181019015	Galan	70.2566	0.579088	14.4786	3.20107	1.10168	0.0481164	2.54904	3.38662	4.183	0.216174	100		338.34	260.983	255.416	187.139	19.206	20.6877	2.35106	5.14038	9.4795	206.704	63.7428			27.5027	29.9697	10.862	46.0521	92.7489	10.8177	38.858	7.73711	1.20469	5.52146	0.80579	4.13152	0.713207	1.80219	0.250885	1.56101	0.226108	6.60186					16.2658
CGI181017009	Galan	68.762	0.489843	13.8625	2.86988	1.04302	0.034863	5.56251	3.49085	3.7051	0.179384	100		242.646	219.636	324.787	161.108	16.7082	16.1593	2.05111	4.58933	9.02775	277.795	58.456			21.708	25.2368	9.92425	35.2717	71.2539	8.36767	30.8213	6.33736	1.03243	4.65633	0.686678	3.54769	0.632694	1.57381	0.223566	1.36985	0.195372	5.49373					13.9673
CG18102018 white	Galan	69.6379	0.636092	14.9399	3.42901	1.26202	0.0528109	2.6956	3.56225	3.56014	0.224346	100		317.6	493.185	271.55	205.24	20.3	20.35	2.44311	5.79144	10.65	277.1	74			8.9	35.05	11.9	71.5298	141.478	15.9884	56.2947	10.1572	1.3431	6.79667	0.947196	4.8022	0.809968	1.98832	0.278722	1.67791	0.237243	7.10008			0.7125	9.15	18.9063
CG1016002 grey	Galan	69.1407	0.526059	15.2285	3.26238	1.11224	0.0621547	2.58653	3.07061	4.76443	0.246327	100		457.447	278.048	267.927	183.666	17.2055	15.1618	1.65344	5.00303	10.0747	157.156	57.3563			32.5182	28.8295	9.47625	47.3399	93.3845	11.1854	39.8262	7.70132	1.23968	5.33683	0.755494	3.75784	0.649052	1.57374	0.218021	1.30097	0.178962	5.79875					14.7946
CG181019014 white	Galan	70.0244	0.581009	14.7994	3.29502	0.968637	0.040509	2.4899	3.32943	4.23334	0.238389	100		386.707	266.711	270.341	195.409	19.4025	19.8503	2.27559	5.49388	9.0545	209.099	66.1675			25.472	30.3475	9.751	51.4272	102.88	11.9891	43.1918	8.15414	1.28271	5.98892	0.843151	4.34118	0.74415	1.85587	0.255612	1.57921	0.222624	6.49048					17.0913
CG18016005 white	Galan	70.3903	0.577046	14.3185	3.33025	1.12559	0.0533094	2.41446	3.23765	4.35185	0.201028	100		282.7	273.567	235.65	190.181	19.1	20.9	2.42997	5.26958	11.45	310.25	64			21.75	29.1	13	35.092	72.6054	8.78751	32.5492	6.95138	1.09878	5.34706	0.794742	4.19603	0.742283	1.82722	0.261681	1.61243	0.238072	6.81288					16.5198
CG181017008	Galan	68.7824	0.566717	14.722	3.23869	1.23831	0.0389486	2.51798	4.1768	4.52098	0.197091	100		396.94	251.618	269.249	187.427	18.1745	17.6295	2.1884	5.38572	11.4775	279.104	64.566			23.494	26.928	8.078	38.3132	78.0837	9.24702	33.5349	6.73232	1.17227	5.27936	0.756603	3.97721	0.697855	1.73934	0.243336	1.51997	0.217017	5.97898					15.6583
CG0181016001 white	Galan	69.971	0.640261	14.4689	3.52461	1.22781	0.0562958	2.61134	3.26158	4.02513	0.213151	100		274.81	258.401	255.66	201.629	18.9025	21.0465	2.29266	5.84492	12.3692	276.04	72.5665			21.89	25.5858	10.922	31.8867	66.7136	8.08102	30.5482	6.63781	1.13658	5.26679	0.762584	4.13084	0.714188	1.8414	0.265128	1.5977	0.236307	7.065					16.2631
CG181018011 white	Galan	73.9308	0.505786	12.7705	2.93336	0.954391	0.0419868	2.40676	2.71573	3.51559	0.225138	100		458.496	228.491	274.322	165.184	12.7858	15.6215	1.47993	4.48751	10.547	340.937	58.307			18.5568	22.5367	7.363	42.4493	83.5785	9.46709	33.4227	5.93945	1.12566	4.12505	0.560698	2.87882	0.476784	1.20962	0.158784	1.04906	0.153991	5.46698					11.334
Paragneiss***	Paragneiss	68.1225	0.738045	15.5192	5.69204	2.26469	0.101102	1.53675	2.40623	3.44758	0.171873	100		370	129	130	195	36	15		9	30	55	84				22		34.6	65.3	8.3	30.7	6.2	1.2	5.4	0.8	4.8	0.9	2.7	0.4	2.7	0.4	9					18.8976
Orthogneiss***	Orthogneiss	68.7386	0.707499	15.0394	4.98282	1.72832	0.0808571	1.91025	2.90075	3.70932	0.202143	100		340	145	104	207	34	14		7	20	36	74				14		35.5	68.8	8.7	32.6	6.7	1.2	5.9	0.8	5.4	1.1	3.1	0.4	3	0.5	10					21.2598
Metasedimentos***	Metasedimentos	69.6383	0.772957	14.9026	5.926	2.25703	0.0824487	0.845099	2.10244	3.26703	0.206122	100		412	221	93	212	32	14		6	30	68	86				16		37	71.2	8.3	32.2	6.7	1.2	5.7	0.9	5.2	1	2.8	0.4	2.8	0.4	15					20.4724
Granitoidos***	Granitoidos	69.997	0.485388	15.1785	3.8831	1.20336	0.080898	2.05279	3.25614	3.62018	0.242694	100		265	188	225	175	28	23		6	50	46	56				19		23.7	44.7	5.5	20.2	4.4	0.7	4.1	0.7	4.3	0.8	2.4	0.4	2.4	0.4	6					16.9291
Metabas-Post***	Metabas-Post	51.4168	1.40182	15.4501	11.5851	6.87894	0.20026	10.0631	2.05267	0.740963	0.210273	100		99	29	135	110	34	6		4	119	220	263				2		9.6	22.3	3	14	3.8	1.2	4.4	0.8	5.1	1.1	3.1	0.5	2.9	0.4	36					20.0787
Metabas-pre***	Metabas-pre	49.5985	1.01385	15.0271	12.0157	7.48846	0.230877	12.1863	1.70648	0.632403	0.100381	100		94	14	169	62	27	1		4	93	227	277				1		3.8	9.9	1.5	7.4	2.5	0.9	3.4	0.5	4.4	0.9	2.8	0.4	2.7	0.4	36					17.3228
Average		62.9186	0.853261	15.1861	7.34745	3.6368	0.129407	4.76571	2.40412	2.56958	0.188914	100		263.333	121	142.667	160.167	31.8333	12.1667		6	57	108.667	140				12.3333		24.0333	47.0333	5.88333	22.85	5.05	1.06667	4.81667	0.75	4.86667	0.966667	2.81667	0.416667	2.75	0.416667	18.6667					19.1601
Average felsic		69.1241	0.675972	15.1599	5.12099	1.86335	0.0863264	1.58622	2.66639	3.51103	0.205708	100		346.75	170.75	138	197.25	32.5	16.5		7	32.5	51.25	75				17.75		32.7	62.5	7.7	28.925	6	1.075	5.275	0.8	4.925	0.95	2.75	0.4	2.725	0.425	10					19.3898
JC131	Francis et al 1989	53.6384	1.4055	16.4474	8.67225	5.313	0.139553	7.69537	4.26635	2.0634	0.358852	100		495	49	715	166	22	14	0.52	4.42	109	261	0				7		34.3	70.1		34.5	6.94	1.75		0.77		1.2		0.25	1.76	0.28				0.7055	6.7	0
External data sources not identified above
Sample	Baez, 2014
Sample	Arnosio, et al. 2005
Sample*	Montero-Lopez, 2016
Sample**	Bardelli, 2020
Sample***	Becchio et al., 1999
[truncated: 8 more columns]

## Sheet: Table S3. matrix glass
Sample	Unit	SiO2	TiO2	Al2O3	FeO	MgO	MnO	CaO	Na2O	K2O	P2O5	Total	S	Cl	F		Ba	Rb	Sr	Zr	Y	Nb	Ta	Hf	Ni	Cr	V	Co	Cs	Pb	Th	U	La	Ce	Pr	Nd	Sm	Eu	Gd	Tb	Dy	Ho	Er	Tm	Yb	Lu	Sc	Ti	Eu/Eu*
13gl	Postcaldera	77.1696	0.0771233	13.4061	0.480639	0.0459875	0.0849001	0.539729	3.55314	4.63904	0.00380666	100	47	584.182	254.909
CB0713_gl	Postcaldera	77.2991	0.0826881	13.2349	0.495812	0.0432474	0.0911473	0.540857	3.32836	4.88114	0.00274922	100	17	635	294
CB0713_gl	Postcaldera	77.8212	0.0723389	13.1657	0.484375	0.0490285	0.0843772	0.576632	2.85142	4.88403	0.0109439	100	16	580	216
CB0713_gl	Postcaldera	76.0967	0.0777054	14.4858	0.465707	0.043683	0.0705649	0.551183	3.75212	4.45661		100	59	497	451
CB0713_gl	Postcaldera	77.3933	0.0754845	13.1778	0.475489	0.0465417	0.0580976	0.54175	3.49434	4.73273	0.00445274	100	10	492	294
CB0713_gl	Postcaldera	77.3767	0.088211	13.2474	0.477042	0.0551867	0.110154	0.576553	3.6104	4.43908	0.0192002	100		563	102
CB0713_gl	Postcaldera	77.5433	0.079882	12.9945	0.431363	0.0502265	0.12259	0.50404	3.64356	4.61948	0.0110686	100	54	524	441
CB0713_gl	Postcaldera	76.355	0.0609663	13.7764	0.419052	0.0483562	0.08108	0.564955	3.92321	4.77101		100	50	608
CB0713_gl	Postcaldera	77.7851	0.0639117	13.2294	0.457158	0.0429933	0.0854609	0.516129	3.33666	4.48318		100	27	586
CB0713_gl	Postcaldera	77.1305	0.0724042	13.3058	0.464917	0.0431701	0.051867	0.492055	3.76984	4.66279	0.00660125	100	74	625	531
CB0713_gl	Postcaldera	77.3926	0.0860802	13.3509	0.532667	0.0427774	0.0791434	0.541181	3.47663	4.49793		100	102	617	475
CB0713_gl	Postcaldera	76.7068	0.0889652	13.4749	0.583159	0.0411568	0.0999819	0.53483	3.86209	4.60374	0.00436511	100	122	699	147
13 (ave)	Postcaldera																6.66065	422.491	31.545	47.8983	17.926	60.9769		2.9549			5.02192			37.6781			13.5098	32.9595	3.78937	13.4229	3.06419	0.185894	2.49757		2.73076		1.69412		2.16639		6.82402	485.062	0.205064
12Agl	Postcaldera	76.4658	0.0817692	13.1401	0.476111	0.0399738	0.0928775	0.509989	4.63113	4.55274	0.00951307	100	35.2105	655.684	539.842
CB0712A_gl	Postcaldera	76.1288	0.0939106	13.2652	0.53196	0.0450051	0.0696079	0.546962	4.51691	4.80164		100	60	598	746
CB0712A_gl	Postcaldera	76.0785	0.0823693	13.133	0.490152	0.0416307	0.0718625	0.524249	4.96168	4.60763	0.00892086	100	60	752	722
CB0712A_gl	Postcaldera	76.2334	0.0588767	13.2134	0.432398	0.0351054	0.0381144	0.50321	4.93752	4.54434	0.00371114	100		655	440
CB0712A_gl	Postcaldera	76.7083	0.0838215	13.1245	0.496319	0.040058	0.0844223	0.501727	4.4161	4.52616	0.018627	100	57	661	283
CB0712A_gl	Postcaldera	76.4024	0.0943885	13.2468	0.447743	0.041069	0.0988067	0.519237	4.57634	4.56469	0.00853513	100	36	567	543
CB0712A_gl	Postcaldera	76.332	0.0912447	13.1324	0.505531	0.0387491	0.117941	0.495769	4.76086	4.5208	0.00478138	100	51	564	486
CB0712A_gl	Postcaldera	76.2599	0.0859751	12.9987	0.534494	0.035104	0.118798	0.509207	4.82443	4.62392	0.00951974	100	73	688	520
CB0712A_gl	Postcaldera	76.7747	0.072872	13.0854	0.46082	0.0435626	0.103486	0.50619	4.57167	4.36469	0.0165618	100	35	657	509
CB0712A_gl	Postcaldera	76.3205	0.0870747	13.2409	0.477468	0.0383129	0.0866767	0.521254	4.58033	4.63377	0.0137329	100	58	620	509
CB0712A_gl	Postcaldera	77.4423	0.0996864	12.9689	0.519	0.0413408	0.098159	0.502607	3.90549	4.4198	0.00274927	100	33	768	647
CB0712A_gl	Postcaldera	77.0497	0.0889821	12.6045	0.477878	0.0367753	0.135077	0.475573	4.44811	4.67327	0.0101207	100	32	803	691
CB0712A_gl	Postcaldera	77.1241	0.082254	13.1632	0.442039	0.0436657	0.0823555	0.493016	3.95154	4.59414	0.0237623	100	66	643	216
CB0712A_gl	Postcaldera	76.3494	0.0837654	13.1785	0.447381	0.042332	0.0930505	0.503291	4.68008	4.61259	0.0095846	100	67	643	351
CB0712A_gl	Postcaldera	76.2263	0.0833276	13.2448	0.443945	0.0379492	0.0738905	0.517936	4.86201	4.49597	0.0138545	100	19	578	791
CB0712A_gl	Postcaldera	76.1947	0.0807339	13.3084	0.470615	0.0424652	0.0717412	0.528167	4.68167	4.60723	0.0142883	100		689	577
CB0712A_gl	Postcaldera	76.3012	0.0659413	13.2364	0.451698	0.0390652	0.124689	0.500954	4.91073	4.36352	0.00579484	100	60	676	666
CB0712A_gl	Postcaldera	76.588	0.0816127	13.1155	0.471917	0.0376137	0.0979751	0.506238	4.49049	4.60533	0.00528786	100	19	604	770
CB0712A_gl	Postcaldera	76.4162	0.0657117	13.1022	0.488781	0.0368144	0.078478	0.514115	4.87474	4.4203	0.00267201	100	7	652	621
CB0712A_gl	Postcaldera	75.9555	0.0714902	13.2968	0.455128	0.0430136	0.119283	0.519449	5.009	4.51982	0.0105543	100		640	169
12A (ave)	Postcaldera																2.40654	423.755	4.05036	80.9888	27.8078	67.4755		4.90134			0.547656			44.1577			16.6314	36.2375	4.22638	17.0607	3.48589	0.163434	3.73492		4.02957		2.68875		3.11922		8.30214	513.492	0.138225
CB07-12a-1	Postcaldera																3.26924	404.638	6.45688	69.9061	24.391	62.7032		4.7731			0.647844			42.7027			14.7351	33.0723	3.66542	14.6999	3.33738	0.134747	3.37327		3.51783		2.37032		3.03365		7.41523	482.508	0.122556
CB07-12a-2	Postcaldera																2.16952	395.555	2.83076	68.785	23.525	65.8182		4.26838			0.530381			43.0127			13.9763	35.0764	3.63496	15.4877	3.69017	0.14709	3.65316		3.58275		2.15192		2.56921		7.97105	461.385	0.122256
CB07-12a-3	Postcaldera																3.002	442.88	5.17212	101.349	37.171	69.5192		6.09068			0.418584			45.201			20.6801	38.9625	5.24193	21.6193	4.25665	0.204913	4.19755		5.20839		3.30258		4.286		9.2074	538.372	0.147938
CB07-12a-4	Postcaldera																	405.047	2.21434	70.0937	23.8318	65.8665		4.16203						40.5793			14.4533	35.044	3.85433	14.598	2.71522	0.152477	3.06867		3.83752		2.62578		2.27191		8.18422	523.594	0.161202
CB07-12a-5	Postcaldera																1.65327	411.067	3.15167	74.4515	22.0371	64.8936		4.41244			0.455704			42.646			15.118	35.4201	3.73629	15.1823	2.74	0.140663	2.60117		3.57916		2.30667		2.98687		7.89013	487.358	0.160791
CB07-12a-6	Postcaldera																1.93867	483.342	4.47637	101.348	35.8906	76.0523		5.70142			0.685767			50.8045			20.8258	39.8497	5.22536	20.777	4.17596	0.200715	5.51568		4.4518		3.37523		3.56769		9.14478	587.735	0.127627
12Bgl	Postcaldera	76.5542	0.075353	13.1976	0.479115	0.0424876	0.0845437	0.513778	4.53565	4.51463	0.00266087	100	10.1429	591.857	487.571
CB0712B_gl	Postcaldera	76.5556	0.0763473	13.2675	0.491322	0.0463322	0.0990098	0.510862	4.53954	4.40065	0.0127917	100	76	596	666
CB0712B_gl	Postcaldera	76.4055	0.070347	13.1099	0.481274	0.0451225	0.0745678	0.530416	4.71244	4.55497	0.0154763	100	24	623	418
CB0712B_gl	Postcaldera	76.6067	0.06767	13.2088	0.469975	0.0374494	0.06767	0.498991	4.53078	4.5104	0.00160641	100		628	531
CB0712B_gl	Postcaldera	76.589	0.075318	13.1652	0.435125	0.0418545	0.0896739	0.517722	4.50128	4.58489		100	19	507	283
CB0712B_gl	Postcaldera	76.6533	0.0754856	13.2007	0.500795	0.0440667	0.0719723	0.515952	4.47684	4.46098		100		567	328
CB0712B_gl	Postcaldera	76.6129	0.085281	13.1259	0.495076	0.0425392	0.0895349	0.519384	4.47837	4.55099		100		663	486
CB0712B_gl	Postcaldera	76.4484	0.0770978	13.303	0.480054	0.0400547	0.0994843	0.503144	4.50922	4.53954		100		559	701
12B (ave)	Postcaldera																5.27267	469.578	4.7233	73.2845	25.9596	71.5159		4.36832			3.07691			43.6479			14.388	35.6536	3.75285	14.2668	3.16723	0.139751	3.36337		3.62056		2.2751		2.71987		8.72128	588.432	0.130668
CB07-12b-1	Postcaldera																9.68548	473.68	10.2178	73.2323	26.9377	72.0378		4.64068			6.89184			42.6323			14.255	35.1872	3.53381	13.4879	3.19994	0.127319	3.69759		3.70835		2.21865		2.48788		8.54779	705.591	0.112954
CB07-12b-2	Postcaldera																1.87624	440.426	2.24732	71.5544	24.7831	68.0362		4.36795			0.99639			41.7027			14.2608	35.3819	3.7332	13.5154	2.78591	0.173828	3.36486		2.90174		2.06834		3.09487		9.19023	495.651	0.173259
CB07-12b-3	Postcaldera																7.83686	476.624	3.38516	77.6899	26.6833	73.3632		4.52074			3.65673			44.9841			14.7775	36.7085	4.1228	15.1251	3.75029	0.144898	3.44503		4.19062		2.23581		2.74275		8.83851	627.491	0.12302
CB07-12b-4	Postcaldera																1.69209	487.581	3.0429	70.6614	25.4342	72.6264		3.94391			0.762683			45.2725			14.2587	35.3368	3.62158	14.9387	2.93278	0.112959	2.94602		3.68152		2.57761		2.55397		8.30858	524.996	0.117275
5gl	CBI	76.8796	0.0759583	13.3782	0.466637	0.0459816	0.0985164	0.530664	3.88433	4.63251	0.00752165	100	21.9333	655.867	252.733
CB0705_gl	CBI	77.1188	0.0958639	13.4316	0.437373	0.0470472	0.0937822	0.578931	3.60713	4.58731	0.00218582	100		674	113
CB0705_gl	CBI	76.9617	0.0755973	13.515	0.436044	0.0419529	0.0668785	0.506512	3.75433	4.63441	0.00759051	100	22	588	317
CB0705_gl	CBI	77.0165	0.0757317	13.5329	0.465518	0.0531667	0.0942782	0.527237	3.62461	4.61005		100	26	681	23
CB0705_gl	CBI	77.0413	0.0639557	13.5972	0.458745	0.0515571	0.146922	0.542642	3.41321	4.673	0.0114686	100	98	687	45
CB0705_gl	CBI	76.9442	0.0637996	13.4149	0.508439	0.044835	0.108119	0.523178	3.91827	4.46989	0.00432889	100		683	509
CB0705_gl	CBI	76.814	0.0724746	13.4296	0.4571	0.0419536	0.0897256	0.506505	3.98651	4.60214		100	20	687	317
CB0705_gl	CBI	76.408	0.0695614	13.3937	0.45678	0.0429099	0.0897301	0.518521	4.27895	4.73481	0.0071002	100	63	599	328
CB0705_gl	CBI	76.5374	0.0763716	13.3655	0.506014	0.0436557	0.0977351	0.554107	4.03129	4.77756	0.0104237	100		692	283
CB0705_gl	CBI	77.0214	0.0691593	13.3521	0.459694	0.0447381	0.0771629	0.523518	3.75133	4.70089		100	5	676	238
CB0705_gl	CBI	77.1828	0.0751169	13.3749	0.49158	0.0446136	0.0979425	0.539306	3.65303	4.53306	0.00767769	100	25	760	11
CB0705_gl	CBI	76.2454	0.0869962	13.343	0.483028	0.0472294	0.098548	0.513799	4.53218	4.63134	0.0184011	100		647	564
CB0705_gl	CBI	76.64	0.0668976	13.2929	0.470127	0.0478425	0.124677	0.525858	4.19713	4.63017	0.00430275	100	14	591	283
CB0705_gl	CBI	77.2856	0.0843079	12.9355	0.427236	0.0499219	0.108026	0.529047	4.07474	4.50405	0.00165716	100	56	617	34
CB0705_gl	CBI	76.9088	0.0794654	13.4494	0.480921	0.046544	0.0900952	0.528187	3.7068	4.70982		100	15	595	227
CB0705_gl	CBI	77.1118	0.0843894	13.2487	0.460984	0.0418323	0.0944333	0.544027	3.72411	4.68967		100		661	499
5 (ave)	CBI																3.09802	466.412	4.1348	87.0039	32.4373	74.873		6.04917			0.924993			49.2082			18.9398	39.7084	4.76637	18.2239	4.26169	0.168845	3.98746		4.76769		3.40564		4.06257		10.6578	522.23	0.124995
CB07-5_mat-1	CBI																7.70798	414.107	6.95667	91.9646	33.6132	66.9394		6.12492			2.63722			47.213			19.6671	35.1145	4.42973	18.5333	4.40747	0.186077	3.78565		5.18392		3.7844		4.00833		10.3815	549.034	0.139018
CB07-5_mat-2	CBI																2.568	473.04	3.71712	93.5622	34.7217	74.988		6.55095			0.451569			52.9361			20.4173	40.8089	5.507	20.1482	4.33633	0.185244	4.68171		5.66861		3.52473		5.0359		10.2588	494.482	0.125465
CB07-5_mat-3	CBI																1.56704	438.88	2.72633	69.7818	27.4631	71.0816		5.52037			0.364259			43.8157			16.259	36.2678	4.28421	16.4895	3.89995	0.147678	3.16304		3.58798		2.58643		3.23845		9.73703	453.481	0.128314
CB07-5_mat-4	CBI																3.28603	450.68	3.36575	83.7486	31.1292	71.1469		5.89989			1.10528			51.6501			16.9873	40.6491	4.48156	16.4415	3.67718	0.168305	4.16014		4.28621		2.88954		3.68473		10.5353	535.544	0.131319
CB07-5_mat-5	CBI																2.38226	567.775	5.23527	113.68	42.0365	92.9083		7.22801			0.681895			56.0594			24.681	49.5126	5.90147	22.4369	6.05137	0.175204	4.39359		6.34124		4.78816		4.88672		13.5951	623.474	0.103693
CB07-5_mat-6	CBI																1.07682	453.99	2.80762	69.2867	25.6603	72.1736		4.97085			0.309739			43.5752			15.6269	35.8973	3.99425	15.2939	3.19785	0.150566	3.74061		3.5382		2.86059		3.52128		9.43928	477.364	0.132852
10gl	CBI	76.6911	0.0734046	13.2612	0.4757	0.0637045	0.0900244	0.524086	4.27087	4.54372	0.00612038	100	83.8333	591.333	128.333
CB0710_gl	CBI	76.7726	0.0754775	13.2863	0.435479	0.0362046	0.130705	0.505229	4.21038	4.54767		100	70	562	295
CB0710_gl	CBI	77.2042	0.0726559	13.2051	0.48857	0.0391145	0.0839052	0.517673	3.96996	4.41601	0.00278652	100	91	605	317
CB0710_gl	CBI	76.9442	0.0636017	13.3155	0.548049	0.0484241	0.051315	0.505407	3.90985	4.60607	0.00764047	100	60	589	159
CB0710_gl	CBI	75.9443	0.0766158	13.8205	0.464993	0.0508395	0.0799779	0.518889	4.66399	4.35722	0.0227198	100	136	546	282
CB0710_gl	CBI	76.8907	0.0794093	13.2084	0.480499	0.040534	0.11051	0.53254	3.99545	4.66193		100	11	584	79
CB0710_gl	CBI	76.7339	0.084221	13.2527	0.502864	0.0465729	0.0830926	0.516713	4.36811	4.39334	0.0185676	100	70	690	147
CB0710_gl	CBI	76.6268	0.0610486	13.1696	0.448339	0.0400504	0.101099	0.52045	4.51155	4.50961	0.0114722	100	74	618	204
CB0710_gl	CBI	76.4856	0.0665785	13.2774	0.464925	0.037329	0.0748625	0.487731	4.54953	4.5436	0.0124771	100	88	643
CB0710_gl	CBI	76.3897	0.0807493	13.4695	0.468326	0.0467712	0.0730735	0.605773	4.40519	4.45605	0.00491251	100	264	676	192
CB0710_gl	CBI	76.7465	0.0723849	13.3714	0.451559	0.0455871	0.0707421	0.508645	4.136	4.59721		100	30	570
CB0710_gl	CBI	77.0095	0.0792194	13.3545	0.472234	0.0384281	0.0740819	0.557412	3.805	4.60962		100	100	579
CB0710_gl	CBI	76.6599	0.0639176	13.0315	0.538631	0.0472969	0.0652513	0.514111	4.49495	4.56267	0.0217504	100		551	57
CB0710_gl	CBI	76.4226	0.0613535	13.0507	0.495658	0.0494322	0.0894096	0.549201	4.6642	4.61035	0.00709111	100	78	588	215
CB0710_gl	CBI	76.6875	0.0786717	13.0713	0.456566	0.0492995	0.118008	0.514687	4.28927	4.7286	0.00601973	100	7	493
CB0710_gl	CBI	76.4958	0.0779604	13.3151	0.51902	0.0710033	0.14037	0.511551	4.47096	4.39832		100	138	607	362
CB0710_gl	CBI	76.7423	0.0761343	13.2449	0.402527	0.0465835	0.095527	0.559412	4.13105	4.69006	0.011492	100	60	587	170
CB0710_gl	CBI	76.5324	0.0785469	13.232	0.463519	0.0417759	0.0848797	0.480985	4.56267	4.51507	0.00817133	100	12	548	113
CB0710_gl	CBI	77.1543	0.0727087	13.0115	0.461079	0.37627	0.0937806	0.527216	3.71451	4.58858		100	224	608	57
10 (ave)	CBI																3.24368	483.219	4.36047	96.3927	35.22	74.3312		5.72804			0.754976			48.3777			18.6836	36.3734	4.59472	17.4266	4.09089	0.195385	4.21639		4.79325		3.40139		3.99969		10.4848	518.471	0.143566
CB07-10_mat-1	CBI																5.70651	479.942	4.6474	94.8325	34.506	68.7467		6.14763			0.871721			54.95			18.2853	33.2707	4.40943	17.2376	4.19037	0.22667	3.58172		5.07299		3.41501		3.86949		9.74418	477.196	0.178552
CB07-10_mat-2	CBI																2.61432	415.375	3.8429	82.9232	29.1156	64.8698		5.12562			0.481001			40.0027			16.359	32.7288	4.02881	15.9144	4.01474	0.188142	3.62631		4.50235		2.89395		4.19244		9.83936	465.043	0.150476
CB07-10_mat-3	CBI																3.5417	505.687	4.61187	105.02	39.7194	75.7721		5.97455			1.14032			49.9686			20.1693	36.4918	4.95113	19.5117	4.33355	0.267923	4.76505		4.9087		3.57385		4.61527		11.5956	482.596	0.179927
CB07-10_mat-4	CBI																4.52713	516.108	4.25237	113.221	43.6295	80.9149		7.09809			1.01019			43.0256			21.7981	39.2498	5.10485	20.0536	4.31866	0.158016	5.02792		6.148		4.69562		4.84198		12.046	565.364	0.103485
CB07-10_mat-5	CBI																3.57264	457.161	6.7991	102.376	37.0279	70.0999		5.30637			0.934352			45.9642			19.0106	34.379	4.74073	18.4593	4.91239	0.225062	5.18531		5.05975		3.47712		4.42091		10.2524	475.754	0.136085
CB07-10_mat-6	CBI																3.16115	520.281	5.87089	91.2532	32.6528	80.5843		5.67049			0.767747			54.1397			18.6397	39.1406	4.5143	16.8012	3.29142	0.175201	3.46001		3.86557		3.34634		3.66224		10.9469	575.636	0.158434
CB07-10_mat-7	CBI																2.27172	475.715	3.74565	92.3022	33.4779	74.3749		5.71549			0.853619			47.1506			17.6773	37.9625	4.53903	17.7311	3.55032	0.147341	4.10403		4.4419		3.12679		3.26598		9.40435	556.187	0.117795
CB07-10_mat-8	CBI																2.61968	473.355	2.73395	104.949	39.3338	73.5535		6.21186			0.547945			47.5353			19.9284	36.3507	4.62029	16.18	5.23722	0.2286	4.37912		4.95737		3.32895		3.68032		10.8527	528.102	0.145671
CB07-10_mat-9	CBI																2.00285	534.439	4.22704	92.8128	33.2462	82.1521		4.87727			0.529566			53.7156			18.5286	40.2148	4.92412	16.6776	3.96275	0.170139	4.46365		4.82891		3.33654		3.62139		10.7025	569.319	0.123453
CB07-10_mat-10	CBI																2.41914	454.129	2.87354	84.2377	29.4915	72.2442		5.15299			0.413298			47.3248			16.4396	33.9457	4.11448	15.6997	3.09751	0.166751	3.57085		4.14694		2.81972		3.82686		9.46385	489.515	0.15301
CB07-3_mat-1	CPPI																369.606	216.119	103.051	146.908	26.0698	36.0354		3.86553			3.92073			32.3527			59.1814	92.6699	8.91874	28.8034	5.0051	0.728026	4.97665		4.0562		2.08656		1.78231		8.41175	917.777	0.445157
CB07-3_mat-2	CPPI																342.764	211.09	99.6629	145.961	29.0582	35.1719		4.99394			8.73568			34.9526			63.5205	116.295	10.318	36.8861	5.96419	0.991006	4.22594		3.6665		1.78744		1.75673		7.93535	879.67	0.602394
CB07-3_mat-3	CPPI																353.035	203.067	104.619	140.918	25.0182	62.3994		3.73359			40.7928			34.5966			59.3321	90.6464	8.89222	27.2805	5.03326	0.558211	3.93286		3.5464		2.30866		1.6301		7.28515	916.411	0.382879
CB07-3_mat-4	CPPI																361.823	209.552	106.498	146.002	29.1649	33.4685		4.63102			15.1269			26.4993			64.3407	100.104	10.6585	33.5134	5.98785	0.932468	7.25182		4.16961		2.30979		2.41329		8.76093	1169.87	0.431834
CB07-3_mat-5	CPPI																350.734	191.917	102.505	141.254	25.9611	31.7131		3.56867			7.63493			24.4693			50.4449	88.924	7.35622	26.3337	4.57091	0.544134	3.90165		3.39826		2.03451		2.02149		7.91875	931.813	0.393208
CB07-3_mat-6	CPPI																337.802	192.6	102.181	137.665	27.8061	31.7313		4.70933			10.116			24.3162			58.3653	101.005	9.02563	34.6697	4.44685	1.10785	4.33055		3.53499		1.83247		2.76316		7.98208	1047.67	0.770415
CB07-3_mat-7	CPPI																437.151	198.309	105.366	146.086	24.1049	34.5314		4.24201			11.724			28.8421			55.7934	84.5749	8.52949	30.1741	4.7093	0.42572	4.54468		3.18699		2.03788		2.14196		8.73477	1720.9	0.280825
CB07-3_mat-9	CPPI																414.176	198.892	149.113	161.076	27.7082	34.3513		4.93052			15.5052			27.6642			61.0474	106.846	9.81337	36.2519	5.42157	0.942802	4.07583		3.60968		2.74032		1.90324		11.7918	1458.36	0.612057
CB07-03_gl	CPPI	76.3215	0.144358	13.1315	0.197832	0.0653912	0.020208	0.762828	3.99342	5.34104	0.0219698		26	594
CB07-03_gl	CPPI	76.2341	0.13217	13.4422	0.160638	0.012847	0.0145941	0.681403	3.97567	5.32738	0.0190135		23	605	159
CB07-03_gl	CPPI	76.5946	0.153629	13.0682	0.172295	0.0202392	0.0335572	0.684043	3.89715	5.35909	0.0171981		25	610	364
CB07-03_gl	CPPI	76.388	0.148906	13.4569	0.172743	0.0159252	0.0183596	0.689754	3.92024	5.17143	0.017751		53	683
CB07-03_gl	CPPI	76.0139	0.14286	13.4553	0.156295	0.0141527	0.0199983	0.678815	4.14847	5.35719	0.0130245		36	654
2Agl	CPPI Barranca Blanca	76.7302	0.104984	13.1141	0.547376	0.0591049	0.0278974	0.708245	2.87343	5.83078	0.00387671	100	21.4286	1223.14	161.286
CB072A_gl	CPPI Barranca Blanca	76.8068	0.107541	12.8806	0.618571	0.0502912	0.0495531	0.688999	3.1209	5.67668		100	49	1431	397
CB072A_gl	CPPI Barranca Blanca	77.0802	0.0928065	13.0861	0.558314	0.0625733	0.01538	0.703791	2.78251	5.61664	0.00168548	100		1497	149
CB072A_gl	CPPI Barranca Blanca	77.2548	0.087592	13.1095	0.613788	0.0631178	0.0217907	0.706103	2.55101	5.5695	0.0227567	100	12	1378	343
CB072A_gl	CPPI Barranca Blanca	76.6315	0.109532	13.0132	0.550219	0.0575786	0.0316018	0.663228	3.19884	5.74437		100	29	1520	183
CB072A_gl	CPPI Barranca Blanca	76.8002	0.0909772	12.9208	0.61449	0.0631699	0.0126969	0.720682	2.53362	6.24343		100	38	1361	34
CB072A_gl	CPPI Barranca Blanca	76.1997	0.129884	13.3183	0.502164	0.0648909	0.0280002	0.75018	3.1817	5.81811	0.00705114	100	29	790	46
CB072A_gl	CPPI Barranca Blanca	76.3622	0.115166	13.4588	0.379685	0.0521602	0.0359441	0.724252	2.72421	6.13611	0.0114649	100	46	585
2A (ave)	CPPI Barranca Blanca																50.33	279.944	429.86	127.199	6.3495	28.9507		6.44074			9.29044			50.4301			37.6184	37.2922	3.0897	8.54873	0.925946	0.165801	0.697518		0.593799		0.697835		1.03559		5.24623	920.744	0.629592
CB07-2a-1	CPPI Barranca Blanca																65.0678	343.924	104.76	127.899	7.89577	29.2065		6.6765			13.6577			31.7374			44.554	46.7611	3.6639	10.5809	0.985678	0.239151	0.734094		0.690219		0.904165		0.90854		5.34194	1005.53	0.857967
CB07-2a-3	CPPI Barranca Blanca																54.8466	293.822	268.715	120.816	6.89407	27.7073		7.35409			5.43744			61.5973			35.0769	37.0969	2.68319	13.8447	0.543915	0.078851	0.493033		0.555866		0.553572		0.770618		5.46849	857.963	0.464671
CB07-2a-4	CPPI Barranca Blanca																53.8923	311.197	69.5304	85.9628	5.39133	24.6322		4.5279			6.50975			27.5039			33.4206	40.6525	3.10845	8.33236	0.607848	0.158847	0.579416		0.578989		0.585256		0.985569		4.44536	685.806	0.816825
CB07-2a-5	CPPI Barranca Blanca																58.8403	127.964	527.964	143.92	5.04879	29.9023		6.47144			11.6936			43.0397			15.461	37.0971	1.14243	6.06166	0.225211	0.107795	1.15883		0.751682		0.439391		0.369134		5.37283	1059.4	0.643925
CB07-2a-6	CPPI Barranca Blanca																35.6014	215.964	754.96	126.499	4.80323	28.6949		6.20499			4.92318			69.1227			30.6828	27.8232	2.51551	6.51656	0.866214	0.0924515	0.660942		0.497378		0.491506		1.16263		5.15051	835.956	0.372873
2Bgl	CPPI Barranca Blanca	76.9439	0.0928067	12.8605	0.614572	0.060444	0.059225	0.688196	2.66907	6.01071	0.000563758	100	44	1494.86	319
CB072B_gl	CPPI Barranca Blanca	76.9654	0.102535	12.9812	0.662753	0.0588849	0.0760642	0.691169	2.67943	5.77861	0.00399769	100	33	1477	353
CB072B_gl	CPPI Barranca Blanca	77.1801	0.089256	12.8416	0.649367	0.0672345	0.0680856	0.671814	2.57938	5.84589	0.0072341	100	55	1588	194
CB072B_gl	CPPI Barranca Blanca	77.1849	0.0826115	12.6823	0.608889	0.056663	0.0464954	0.680379	2.72575	5.92409	0.0078375	100	61	1424	46
CB072B_gl	CPPI Barranca Blanca	76.8804	0.0907836	12.9226	0.599836	0.0642337	0.062842	0.70079	2.53327	6.14406	0.00117762	100	63	1497	285
CB072B_gl	CPPI Barranca Blanca	76.8057	0.081027	13.0755	0.585455	0.0585136	0.05108	0.675402	2.70894	5.95841		100	56	1416	535
CB072B_gl	CPPI Barranca Blanca	76.6656	0.103978	12.7467	0.606611	0.0588717	0.059507	0.713025	2.85983	6.18587		100	14	1525	410
CB072B_gl	CPPI Barranca Blanca	76.9126	0.0996381	12.7739	0.589579	0.0587115	0.0507833	0.684717	2.59402	6.23552	0.000535689	100	26	1537	410
2B (ave)	CPPI Barranca Blanca																46.3093	313.069	68.4856	120.797	6.44079	26.9235		5.51975			5.09092			32.021			34.1886	35.4313	2.92635	7.36383	0.720291	0.141549	0.687734		0.717777		0.569537		1.12141		4.76731	820.297	0.613739
CB07-2b-1	CPPI Barranca Blanca																54.5058	349.076	72.1332	124.986	7.48149	29.9577		6.30912			8.49657			33.2385			36.2873	42.482	3.52135	7.72761	1.08482	0.134657	0.630018		1.15546		0.597732		1.18962		5.19692	942.772	0.497069
CB07-2b-2	CPPI Barranca Blanca																43.9337	304.843	48.4929	87.6063	4.96882	24.888		4.47211			4.14022			28.7825			30.5663	35.6499	2.72205	6.5343	0.467866	0.0843563	0.762197		0.364058		0.60811		0.754917		4.55112	712.11	0.431087
CB07-2b-3	CPPI Barranca Blanca																54.8145	339.862	64.3183	125.277	7.51711	26.6677		5.39682			4.85218			31.8471			41.5497	40.2805	3.36854	8.81518	0.975326	0.2394	0.776717		0.615583		0.550216		1.30424		4.53977	893.152	0.839383
CB07-2b-4	CPPI Barranca Blanca																39.1774	282.206	72.0568	126.067	5.74035	26.7086		5.19799			3.73433			31.7822			31.4862	28.6742	2.41903	6.34487	0.277985		0.492702		0.621292		0.379672		0.773306		4.8418	787.842
CB07-2b-5	CPPI Barranca Blanca																50.4163	331.276	82.6656	132.078	7.55819	27.8561		5.25489			3.77829			30.8114			36.9998	37.675	3.4043	8.86277	1.05483	0.102339	0.578771		0.945435		0.513963		1.09825		5.13748	802.157	0.399705
CB07-2b-6	CPPI Barranca Blanca																35.0079	271.152	71.2469	128.767	5.37878	25.463		6.48758			5.54395			35.6642			28.2424	27.8266	2.12286	5.89826	0.46092	0.146991	0.885998		0.604832		0.767528		1.60815		4.33676	783.75	0.701946
11gl	CPPI	76.8224	0.139949	13.0317	0.801984	0.0970874	0.0607854	0.762039	2.92527	5.34359	0.0151737	100	45.1429	1253.71
CB0711_gl	CPPI	76.6815	0.144399	13.2701	0.829974	0.102655	0.0638933	0.789935	2.81972	5.29111	0.0067088	100	143	1049
CB0711_gl	CPPI	76.3839	0.140433	13.2716	0.796381	0.103939	0.0550022	0.769298	3.04708	5.4219	0.0104567	100	21	1294
CB0711_gl	CPPI	76.7527	0.133366	13.0371	0.801584	0.103303	0.0289973	0.786445	2.95485	5.3967	0.00501056	100	16	1214	68
CB0711_gl	CPPI	77.0949	0.142188	12.8766	0.813816	0.0881331	0.0780913	0.736472	2.76802	5.37868	0.0230749	100	54	1228
CB0711_gl	CPPI	77.2117	0.142966	13.084	0.780531	0.0975533	0.0590786	0.726183	2.58359	5.295	0.0193425	100	23	1398
CB0711_gl	CPPI	76.8167	0.148936	13.1035	0.79422	0.0924539	0.0653173	0.760667	2.84914	5.34529	0.0237709	100	39	1328	79
CB0711_gl	CPPI	76.8192	0.127274	12.5757	0.797921	0.0915144	0.0751159	0.765547	3.45374	5.2762	0.0177739	100	20	1265	11
11 (ave)	CPPI																387.911	199.581	108.762	152.718	27.1119	35.5351		5.26981			3.60912			36.4698			63.4863	94.5294	10.0687	35.0453	6.212	0.821579	4.92354		4.32906		2.48288		2.38343		6.6315	906.221	0.453353
CB07-11_mat-1	CPPI																415.68	211.711	112.323	154.312	27.2511	37.493		5.2995			4.57284			35.0666			65.3018	98.2855	10.5611	37.2573	6.24341	0.869156	4.49065		3.8924		2.57231		2.31151		7.38029	913.542	0.500927
CB07-11_mat-2	CPPI																432.936	226.165	110.995	147.118	24.3123	41.6944		5.20827			3.95522			42.3876			63.4137	104.254	10.7481	34.9186	5.63999	0.95787	4.17396		3.66399		2.05696		1.8359		7.28451	1025.01	0.602469
CB07-11_mat-3	CPPI																359.906	191.403	96.8873	145.813	24.3042	33.4225		5.45261			3.5231			33.7955			59.7969	85.995	9.24876	30.4215	5.22463	0.78371	4.79505		3.88919		1.97979		2.21217		6.07964	797.902	0.477829
CB07-11_mat-4	CPPI																357.028	183.663	93.1133	134.178	27.5606	33.1829		5.16329			3.06094			42.3646			57.0843	86.0028	10.5925	35.6504	6.53256	0.74245	4.89311		4.64759		2.25498		2.02236		6.48272	942.573	0.400751
CB07-11_mat-5	CPPI																393.508	198.438	117.8	162.618	29.227	35.6585		5.55826			3.575			31.6728			67.0861	97.2326	10.5467	37.0719	7.2544	0.880384	5.20549		4.25884		2.73472		2.39569		6.40711	905.926	0.437202
CB07-11_mat-6	CPPI																386.724	198.703	114.668	160.02	28.4331	35.0277		5.24624			3.7028			31.7412			65.5337	95.0396	9.68357	35.5575	6.64689	0.79397	5.65903		4.96532		2.7474		3.15318		6.9008	861.072	0.395062
CB07-11_mat-7	CPPI																378.437	192.146	107	152.685	27.2857	34.4302		5.11551			3.22031			34.627			64.9541	94.5165	9.47331	34.125	5.83295	0.780762	4.82831		4.605		2.71559		2.18677		6.53179	867.008	0.448972
CB07-11_mat-8	CPPI																394.542	202.547	112.072	157.845	26.8565	35.0019		4.90079			3.87242			42.8934			63.4539	92.8873	10.1276	34.745	5.34248	0.763544	3.81454		3.96535		2.3493		2.27466		6.38874	956.934	0.516159
CB07-11_mat-9	CPPI																381.303	200.406	112.42	163.658	27.8848	35.5459		5.94895			3.35622			37.5258			64.2034	94.6721	9.5714	34.3984	6.81288	0.806082	5.71883		4.86909		2.94166		2.74614		6.55521	919.555	0.394096
CB07-11_mat-10	CPPI																379.043	190.627	110.338	148.937	28.0039	33.8938		4.80464			3.25235			32.6237			64.0356	96.4087	10.1338	36.3076	6.58984	0.837857	5.65645		4.53381		2.4761		2.69591		6.30424	872.688	0.418796
[truncated: 4 more columns]

## Sheet: Table S4. Radiogenic Isotopes
Sample		87Sr/86Sr	Error	143Nd/144Nd			206/204		207/204		208/204		205Tl/208Pb
				JNd-1(2) La Jolla (1)		NBS981 (50ppb)	16.93	0.001	15.483	0.001	36.673	0.002	0.54
NBS987		0.710283	8e-06	0.512111	1.4e-05	NBS981 (50ppb)	16.93	0.001	15.483	0.001	36.674	0.002	0.54
NBS987		0.710258	1e-05	0.512121	9e-06	NBS981 (100ppb)	16.931	0.001	15.484	0.001	36.674	0.002	0.71
Sample		87Sr/86Sr	Error	143Nd/144Nd			206/204		207/204		208/204		205Tl/208Pb
DOMO 01	Post caldera	0.706799	7e-06	0.512516	9e-06		18.958	0.001	15.651	0.001	39.001	0.002	0.13
CBV 02	Intra-caldera	0.706792	1e-05	0.512505	1.2e-05		18.963	0.001	15.645	0.001	39.001	0.002	0.25
CB 20-D	Cerro Blanco	0.706958	8e-06	0.512528	1e-05		18.96	0.001	15.645	0.001	39.001	0.002	0.21
Cpomez 01	Cerro Blanco	0.706615	8e-06	0.512524	1.1e-05		18.965	0.001	15.646	0.001	39.001	0.002	0.16
CB 35	Cerro Blanco	0.707407	8e-06	0.512505	9e-06		18.963	0.001	15.646	0.001	39.001	0.002	0.21
CBV 12A	CPP	0.706626	1.1e-05	0.512531	1e-05		18.964	0.001	15.645	0.002	39.002	0.004	0.38
CB6	CPP	0.706628	1.1e-05	0.512534	1.6e-05		18.954	0.001	15.642	0.001	39.003	0.004	0.19
CB44	PreCPP (SE)	0.706839	8e-06	0.512519	1e-05		18.964	0.001	15.643	0.001	39.001	0.002	0.27
BCR-C				0.512663	1e-05
Nd Blank 309pg
Purification Procedures and Sr Analyses
Ramos, F.C., 1992: Isotope Geology of the Metamorphic Core of the Central Grouse Creek Mountains, Box Elder County, Utah. UCLA PhD, 1992.
Sample digestion:
200-400 milligrams of rock powder was dissolved using hydrofluoric, nitric, and hydrochloric acids.
Sr Isotopes:
Sr is purified using cation exchange resin and 2.5N HCl. Sr is loaded onto pre-outgassed and clean rhenium filaments with phosphoric acid and tantalum oxide. Sr isotopes were analyzed using TIMS and five Faraday collectors in dynamic mode and 88Sr=3.0V. Sr isotopes were normalized to 86Sr/88Sr=01194 and corrected for any Rb present during the analysis.
Nd Isotopes:
REEs were purified using cation exchange resin and 6.0 N HCl. Nd was then separated/purified from the remaining REEs using HDEHP resin and 0.25N HCl. Nd was loaded onto pre-outgassed and clean rhenium, triple filaments. Nd isotopes were analyzed using TIMS and five Faraday collectors in dynamic mode with 144Nd=0.5V. Nd isotopes were normalized to 146Nd/144Nd=0.7219 and corrected for any Sm presen…
Pb Isotopes:
Pb was purified using anion exchange resin and 1.0 N HBr. Pb was dissolved in 1 ml of 2% HNO3 and Tl was introduced into the sample to obtain a Pb/Tl ratio between 2-5 (Wolff et al., 2003). Samples were analyzed using a ThermoScientific Neptune in static mode using five Faraday collectors. Pb isotope results were normalized to 203Tl/205Tl=0.41892 and corrected for Hg during analysis.
Standards:
NBS987 Sr (n=2) were 0.710283(±0.000008), 0.710258 (±0.000010)
La Jolla Nd (n=2) were 0.511868(±0.000010), 0.511876 (±0.000013)
NMS981 (n=3) were 16.930, 15.484, and 36.674 for 206Pb/204Pb, 207Pb/204Pb, and 208Pb/204Pb respectively

## Sheet: Table S5. O-isotopes
Dec 15 09	DeSilva , Roberge Cerro Blanco quartz
		day 2 (single HF-treated Qz)	day 1 bulk HF untreated Qz)
		‰
CB07-12B	Qz-1	8.345
CB07-14	Qz-1	8.555
CB07-13	Qz, 2Xtls	8.545
CB07-08	Qz-1	8.469	8.57
CB07-06	Qz-1	8.195
CB07-15	Qz-1	8.705
CB07-05	Qz-1	8.675	8.62
CB07-10	Qz-1	8.395
CB07-02B	Qz-2 Xtls	7.625	7.71
CB07-01			6.7	Sanidine
CB07-03	Qz-1	8.335	8.19	some residue
CB07-11	Qz, 2Xtls	8.36
CB-6	Qz-2 Xtls	8.115
		standards	standards
		±0.075	±0.07

## Sheet: Table S6. Least Squares Models
Major Element modelling of crystal fractionation following Least Squares modeling approach of Stormer and Nicholls, 1978)															Major Element modelling of crystal fractionation following Least Squares modeling approach of Stormer and Nicholls, 1978)														Major Element modelling of crystal fractionation following Least Squares modeling approach of Stormer and Nicholls, 1978)
Path 1a CPPI to Average CPPI glass (F = 93%; Sum of R2 = 0.0134)															Path 2 CPPI to Post Caldera dome (F = 52%; Sum of R2 = 0.0012)														Path 3 DOMO01 to Ave matrix Glass (F = 97.6%; Sum of R2 = 0.0067)
OXIDE	Parent	Plag	Opx	Hbl	Qz	Biot	Kfs	Mt	Ap	Calculated	Daughter	Residuals	Rsquared		OXIDE	Parent	Plag	Qz	Kfs	Biot	Hbl	Mt	Ap	Calculated	Daughter	Residuals	Rsquared		OXIDE	PARENT	Plag	Hbl	Biot	Qz	Kfs	Mt	Ap	Calculated	Daughter	Residuals	Rsquared
	CBV12A	0.1238	0.0067	0.0518	0.3622	0.0396	0.4134	0.0092	0.0019		Ave glass					CBV12A	0.19	0.3	0.45	0.03	0.003				DOMO01					DOMO01	0.1619	0.1698	0.0733	0.3468	0.2201	0.0268	0.0013		Ave gl
SiO2	73.9337	60.6	56.5	47.12	100	37.81	65.52	0	0	76.7087	76.7045	-0.005	2.5e-05		SiO2	73.9337	58.76	100	65.95	37.81	47.12			75.8957	75.8976	0.00186	3.4596e-06		SiO2	75.8976	60.6	47.12	37.81	100	65.52	0	0	76.7556	76.752	-0.003	9e-06
TiO2	0.22595	0	0.07	2.23	0	4.97	0	7.51	0	0.13895	0.120524	-0.018	0.000324		TiO2	0.22595	0	0	0	4.97	2.23	7.51		0.0979503	0.070007	-0.0279433	0.000780828		TiO2	0.070007	0	2.23	4.97	0	0	7.51	0	0.013007	0.0767217	0.064	0.004096
Al2O3	13.687	24.47	0.84	8.56	0	14.33	18.33	0	0	13.024	13.0345	0.01	0.0001		Al2O3	13.687	25.99	0	18.97	14.33	8.56			13.415	13.4213	0.00635	4.03225e-05		Al2O3	13.4213	24.47	8.56	14.33	0	18.33	0	0	13.2903	13.2767	-0.014	0.000196
FeOtot	1.68963	0.26	13.75	13.08	0	19.1	0.16	89.84	0	0.545628	0.540441	-0.005	2.5e-05		FeOtot	1.68963	0.21	0	0.11	19.1	13.08	89.83		0.615628	0.620062	0.0044341	1.96612e-05		FeOtot	0.620062	0.26	13.08	19.1	0	0.16	89.84	0	0.484062	0.475641	-0.009	8.1e-05
MnO	0.0599868	0	0.6	0.4	0	0.18	0	1.74	0	-0.0290132	0.0705069	0.1	0.01		MnO	0.0599868	0	0	0	0.18	0.4	1.74		0.0749868	0.080008	0.0050212	2.52124e-05		MnO	0.080008	0	0.4	0.18	0	0	1.74	0	0.074008	0.047627	-0.027	0.000729
MgO	0.4569	0	27.63	14.48	0	13.63	0.02	0.91	0	0.0488995	0.042029	-0.007	4.9e-05		MgO	0.4569	0	0	0	13.63	14.48	0.91		0.4419	0.450045	0.0081455	6.63492e-05		MgO	0.450045	0	14.48	13.63	0	0.02	0.91	0	0.107045	0.0901724	-0.017	0.000289
CaO	1.23973	6.12	0.61	11.5	0	0.01	0.26	0	62.97	0.735727	0.730327	-0.005	2.5e-05		CaO	1.23973	7.75	0	0.18	0.01	11.5		62.97	0.624727	0.620062	-0.0046649	2.17613e-05		CaO	0.620062	6.12	11.5	0.01	0	0.26	0	62.97	0.512062	0.523649	0.011	0.000121
Na2O	3.6492	7.58	0	1.76	0	0.56	3.3	0	0	3.1662	3.1153	-0.051	0.002601		Na2O	3.6492	6.59	0	3.88	0.56	1.76			4.2162	4.21042	-0.005776	3.33622e-05		Na2O	4.21042	7.58	1.76	0.56	0	3.3	0	0	4.15842	4.17502	0.017	0.000289
K2O	4.96891	0.96	0	0.88	0	9.4	12.4	0	0	5.64591	5.63153	-0.014	0.000196		K2O	4.96891	0.7	0	10.91	9.4	0.88			4.60191	4.60046	-0.001447	2.09381e-06		K2O	4.60046	0.96	0.88	9.4	0	12.4	0	0	4.57046	4.57653	0.006	3.6e-05
P2O5	0.0889804	0	0	0	0	0	0	0	37.03	0.0139804	0.010396	-0.004	1.6e-05		P2O5	0.0889804	0	0	0	0	0		37.03	0.0169804	0.030003	0.0130226	0.000169587		P2O5	0.030003	0	0	0	0	0	0	37.03	0.034003	0.00592452	-0.029	0.000841
TOT	100	99.99	100	100.01	100	99.99	99.99	100	100	99.999	100	0.001	0.013361		TOT	100	100	100	100	100	100			100.001	100	-0.00099783	0.00116264		TOT	100	99.99	100.01	99.99	100	99.99	100	100	99.999	100	-0.001	0.006687
RESULTS															RESULTS														RESULTS
	BULK COMP.	OBS.DIFF.	CALC.DIFF.	OBS.-CALC.												BULK COMP.	OBS.DIFF.	CALC.DIFF.	OBS.-CALC.											BULK COMP.	OBS.DIFF.	CALC.DIFF.	OBS.-CALC.
	OR ADDED OR	BETWEEN	BETWEEN	RESIDUALS												OR ADDED OR	BETWEEN	BETWEEN	RESIDUALS	Square										OR ADDED OR	BETWEEN	BETWEEN	RESIDUALS
OXIDE	SUBTR.MATL.	MAGMAS	MAGMAS												OXIDE	SUBTR.MATL.	MAGMAS	MAGMAS											OXIDE	SUBTR.MATL.	MAGMAS	MAGMAS
SiO2	80.121	2.771	2.775	-0.005											SiO2	71.822	1.964	1.962	0.002	4e-06									SiO2	93.693	0.854	0.858	-0.003
TiO2	0.013	-0.105	-0.087	-0.018											TiO2	0.336	-0.156	-0.128	-0.028	0.000784									TiO2	-1.054	0.007	-0.057	0.064
Al2O3	12.219	-0.653	-0.663	0.01											Al2O3	13.987	-0.266	-0.272	0.006	3.6e-05									Al2O3	10.692	-0.145	-0.131	-0.014
FeOtot	-0.867	-1.149	-1.144	-0.005											FeOtot	2.852	-1.07	-1.074	0.005	2.5e-05									FeOtot	-2.208	-0.144	-0.136	-0.009
MnO	-0.039	0.011	-0.089	0.1											MnO	0.048	0.02	0.015	0.005	2.5e-05									MnO	-0.067	-0.032	-0.006	-0.027
MgO	-0.46	-0.415	-0.408	-0.007											MgO	0.482	-0.007	-0.015	0.009	8.1e-05									MgO	-6.674	-0.36	-0.343	-0.017
CaO	0.109	-0.509	-0.504	-0.005											CaO	1.899	-0.62	-0.615	-0.004	1.6e-05									CaO	-1.602	-0.096	-0.108	0.011
Na2O	2.521	-0.534	-0.483	-0.051											Na2O	3.031	0.561	0.567	-0.006	3.6e-05									Na2O	3.143	-0.035	-0.052	0.017
K2O	6.465	0.663	0.677	-0.014											K2O	5.362	-0.368	-0.367	-0.002	4e-06									K2O	3.983	-0.024	-0.03	0.006
P2O5	-0.081	-0.079	-0.075	-0.004											P2O5	0.18	-0.059	-0.072	0.013	0.000169									P2O5	0.094	-0.024	0.004	-0.029
			TOTAL	0														TOTAL	0	0.00118												TOTAL	0
SUM OF	THE SQUARES	OF THE	RESIDUALS	0.0134											SUM OF	THE SQUARES	OF THE	RESIDUALS	0.0012										SUM OF	THE SQUARES	OF THE	RESIDUALS	0.0066
PHASE	AMOUNT AS	AMOUNT AS	AMOUNT AS	AMOUNT AS											PHASE	AMOUNT AS	AMOUNT AS	AMOUNT AS	AMOUNT AS										PHASE	AMOUNT AS	AMOUNT AS	AMOUNT AS	AMOUNT AS
NAME	WT.% OF	WT.% OF	WT.% OF	WT.% OF											NAME	WT.% OF	WT.% OF	WT.% OF	WT.% OF										NAME	WT.% OF	WT.% OF	WT.% OF	WT.% OF
	INIT. MAGMA	ALL PHASES	ADDED PHS.	SUBTRD.PHS.												INIT. MAGMA	ALL PHASES	ADDED PHS.	SUBTRD.PHS.											INIT. MAGMA	ALL PHASES	ADDED PHS.	SUBTRD.PHS.
Plag	10.87	11.51	12.38	0											Plag	-9.13	18.98	0	18.98										Plag	1.6	16.19	21.39	0
Opx	-0.64	0.67	0	9.68											Qz	-14.2	29.5	0	29.5										Hbl	-1.67	16.98	0	69.85
Hbl	-4.89	5.18	0	74.34											Kfs	-21.8	45.3	0	45.3										Biot	-0.72	7.33	0	30.15
Qz	34.18	36.22	38.93	0											Biot	-1.45	3.01	0	3.01										Qz	3.42	34.68	45.82	0
Biot	3.74	3.96	4.26	0											Hbl	-0.16	0.34	0	0.34										Kfs	2.17	22.01	29.08	0
Kfs	39.02	41.34	44.44	0											Mt	-1.15	2.38	0	2.38										Mt	0.26	2.68	3.54	0
Mt	-0.87	0.92	0	13.26											Ap	-0.23	0.49	0	0.49										Ap	0.01	0.13	0.17	0
Ap	-0.18	0.19	0	2.72
															TOTAL REL.	TO INITIAL	MAGMA	0	48.13										TOTAL REL.	TO INITIAL	MAGMA	7.46	2.4
TOTAL REL.	TO INITIAL	MAGMA	87.81	6.57														F=	51.87													F=	97.6
			F =	93.43
Stormer, J.C., and Nicholls, J., 1978, XLFRAC: A program for the interactive testing of magmatic differentiation models: Computers & Geosciences, v. 4, interactive testing of magmatic differentiation models: Computers & Geosciences, v. 4, 1234 no. 2, p. 143–159, https://doi.org/10.1016/0098-3004(78)90083-3.

## Sheet: Table S7 Norms
In-situ matrix glass analyses - Norm Calculations				ONLY COMPOSITIONS WITH NORMATIVE C <1% ARE SHOWN HERE										Norms																											Normalize Qz, Ab, Or to 100%						Blundy and Cashman, 2001
Sample	SiO[2]	TiO[2]	Al[2]O[3]	FeO	MgO	MnO	CaO	Na[2]O	K[2]O	P[2]O[5]	Total			%AN	Q	or	ab	an	lc	ne	kal	C	di	hy	wo	ol	ac	mt	il	hem	ti	ap	cc	pero	wus	ru	KMS	NMS	COS		Total QAbOr	Qz	Ab	Or	Total		Qz'	Or'	Ab'
12Agl	76.47	0.082	13.14	0.48	0.04	0.09	0.51	4.63	4.55	0.01	100			4.00062	31.1527	26.8745	39.1584	1.63186	0	0	0	0	0.214781	0	0.259306	0	0	0.0561032	0.155654	0.494488	0	0	0	0	0	0	0	0	0		97.19	32.05	27.65	40.29	100		30.63	25.17	44.19
CB0712A_gl	76.13	0.094	13.27	0.53	0.045	0.07	0.55	4.52	4.8		100			4.35812	30.4182	28.3476	38.2232	1.74172	0	0	0	0	0.241598	0	0.259701	0	0	0	0.149643	0.588649	0.0371692	0	0	0	0	0	0	0	0		96.99	31.36	29.23	39.41	100		29.87	26.39	43.73
CB0712A_gl	76.08	0.082	13.13	0.49	0.042	0.07	0.52	4.96	4.61	0.009	100			0	28.9787	27.2311	41.8526	0	0	0	0	0	0.225538	0	0.951114	0	0.0881134	0	0.149673	0.513878	0.0077431	0	0	0	0	0	0	0	0		98.06	29.55	27.77	42.68	100		29.57	27.23	43.2
CB0712A_gl	76.23	0.059	13.21	0.43	0.035	0.04	0.5	4.94	4.54	0.004	100			1.09247	29.4254	26.8207	41.7884	0.461568	0	0	0	0	0.18797	0	0.721567	0	0	0	0.0855377	0.477737	0.0342127	0	0	0	0	0	0	0	0		98.03	30.02	27.36	42.63	100		29.66	26.32	44.03
CB0712A_gl	76.71	0.084	13.12	0.5	0.04	0.08	0.5	4.42	4.53	0.019	100			5.9268	32.5702	26.7555	37.3811	2.35508	0	0	0	0.0818499	0	0.099568	0	0	0	0.0176864	0.159445	0.543183	0	0.0439948	0	0	0	0	0	0	0		96.71	33.68	27.67	38.65	100		31.51	24.4	44.1
CB0712A_gl	76.4	0.094	13.25	0.45	0.041	0.1	0.52	4.58	4.56	0.009	100			5.20447	31.2165	26.934	38.736	2.12669	0	0	0	0	0.220154	0	0.0705303	0	0	0.0539702	0.178435	0.462642	0	0	0	0	0	0	0	0	0		96.89	32.22	27.8	39.98	100		30.35	24.71	44.94
CB0712A_gl	76.33	0.091	13.13	0.51	0.039	0.12	0.5	4.76	4.52	0.005	100			2.68302	30.4947	26.6957	40.2553	1.10983	0	0	0	0	0.209398	0	0.459394	0	0	0.127897	0.172727	0.47826	0	0	0	0	0	0	0	0	0		97.45	31.29	27.4	41.31	100		30.36	25.53	44.11
CB0712A_gl	76.26	0.086	13	0.53	0.035	0.12	0.51	4.82	4.62	0.01	100			0.466335	29.8906	27.2895	40.7675	0.191004	0	0	0	0	0.187944	0	0.875384	0	0	0.142395	0.163256	0.490545	0	0	0	0	0	0	0	0	0		97.95	30.52	27.86	41.62	100		30.38	27.08	42.54
CB0712A_gl	76.77	0.073	13.09	0.46	0.044	0.1	0.51	4.57	4.36	0.017	100			5.67532	32.3997	25.7549	38.6549	2.32578	0	0	0	0	0.0718237	0.0762425	0	0	0	0.114806	0.138584	0.431837	0	0.039369	0	0	0	0	0	0	0		96.81	33.47	26.6	39.93	100		31.34	23.5	45.16
CB0712A_gl	76.32	0.087	13.24	0.48	0.038	0.09	0.52	4.58	4.63	0.014	100			4.65872	30.944	27.3479	38.7366	1.89281	0	0	0	0	0.204048	0	0.13867	0	0	0.0416224	0.16515	0.504492	0	0.0324192	0	0	0	0	0	0	0		97.03	31.89	28.19	39.92	100		30.25	25.33	44.43
CB0712A_gl	77.44	0.1	12.97	0.52	0.041	0.1	0.5	3.91	4.42	0.003	100			6.97427	36.6293	26.105	33.0668	2.47906	0	0	0	0.843935	0	0.102054	0	0	0	0.0365885	0.18981	0.552342	0	0	0	0	0	0	0	0	0		95.8	38.23	27.25	34.52	100		35.61	23.95	40.44
CB0712A_gl	77.05	0.089	12.6	0.48	0.037	0.14	0.48	4.45	4.67	0.01	100			1.60141	32.5753	27.5822	37.6345	0.612492	0	0	0	0	0.198664	0	0.631434	0	0	0.198937	0.168935	0.395955	0	0	0	0	0	0	0	0	0		97.79	33.31	28.2	38.48	100		32.77	26.95	40.28
CB0712A_gl	77.12	0.082	13.16	0.44	0.044	0.08	0.49	3.95	4.59	0.024	100			6.37028	35.523	27.118	33.4161	2.27353	0	0	0	0.860043	0	0.109557	0	0	0	0.0234861	0.155695	0.472682	0	0.0555888	0	0	0	0	0	0	0		96.06	36.98	28.23	34.79	100		34.66	24.99	40.35
CB0712A_gl	76.35	0.084	13.18	0.45	0.042	0.09	0.5	4.68	4.61	0.01	100			3.27344	30.5862	27.2315	39.5849	1.33964	0	0	0	0	0.225541	0	0.354943	0	0	0.0503151	0.159465	0.465203	0	0	0	0	0	0	0	0	0		97.4	31.4	27.96	40.64	100		30.26	25.79	43.94
CB0712A_gl	76.23	0.083	13.24	0.44	0.038	0.07	0.52	4.86	4.5	0.014	100			2.4221	29.9144	26.5822	41.1083	1.0204	0	0	0	0	0.204065	0	0.496979	0	0	0	0.149679	0.488807	0.0101962	0.0324219	0	0	0	0	0	0	0		97.6	30.65	27.23	42.12	100		29.81	25.49	44.69
CB0712A_gl	76.19	0.081	13.31	0.47	0.042	0.07	0.53	4.68	4.61	0.014	100			4.10426	30.3364	27.2306	39.5837	1.69415	0	0	0	0	0.225534	0	0.227698	0	0	0	0.149671	0.522107	0.0052902	0.0324202	0	0	0	0	0	0	0		97.15	31.23	28.03	40.74	100		29.79	25.4	44.81
CB0712A_gl	76.3	0.066	13.24	0.45	0.039	0.12	0.5	4.91	4.36	0.006	100			2.82954	30.1895	25.756	41.5324	1.2094	0	0	0	0	0.209442	0	0.418013	0	0	0.200345	0.125301	0.361753	0	0	0	0	0	0	0	0	0		97.48	30.97	26.42	42.61	100		29.96	24.52	45.52
CB0712A_gl	76.59	0.082	13.12	0.47	0.038	0.1	0.51	4.49	4.61	0.005	100			5.07044	31.7706	27.2257	37.9698	2.02807	0	0	0	0	0.204018	0	0.09952	0	0	0.088716	0.155636	0.460825	0	0	0	0	0	0	0	0	0		96.97	32.76	28.08	39.16	100		30.95	25.11	43.94
CB0712A_gl	76.42	0.066	13.1	0.49	0.037	0.08	0.51	4.87	4.42	0.003	100			1.97479	30.3838	26.108	41.1902	0.829808	0	0	0	0	0.198682	0	0.602888	0	0	0.0698261	0.125289	0.496159	0	0	0	0	0	0	0	0	0		97.68	31.1	26.73	42.17	100		30.42	25.25	44.33
CB0712A_gl	75.96	0.071	13.3	0.46	0.043	0.12	0.52	5.01	4.52	0.011	100			1.05527	28.8005	26.6945	42.3677	0.451861	0	0	0	0	0.230865	0	0.733984	0	0	0.185814	0.134759	0.382756	0	0.0254687	0	0	0	0	0	0	0		97.86	29.43	27.28	43.29	100		29.09	26.2	44.72
12Bgl	76.55	0.075	13.2	0.48	0.042	0.08	0.51	4.54	4.51	0.003	100			5.69171	31.7617	26.6415	38.4018	2.31763	0	0	0	0	0.164619	0.0282458	0	0	0	0.0437601	0.142384	0.503066	0	0	0	0	0	0	0	0	0		96.8	32.81	27.52	39.67	100		30.73	24.28	44.99
CB0712B_gl	76.56	0.076	13.27	0.49	0.046	0.1	0.51	4.54	4.4	0.013	100			5.98398	32.1723	25.9875	38.3956	2.44382	0	0	0	0.142565	0	0.114502	0	0	0	0.106101	0.144259	0.471091	0	0.0301014	0	0	0	0	0	0	0		96.56	33.32	26.91	39.77	100		31.09	23.59	45.32
CB0712B_gl	76.41	0.07	13.11	0.48	0.045	0.07	0.53	4.71	4.55	0.015	100			2.90334	30.7187	26.8778	39.8398	1.19127	0	0	0	0	0.241658	0	0.429494	0	0	0.0256167	0.132891	0.515579	0	0.034738	0	0	0	0	0	0	0		97.44	31.53	27.58	40.89	100		30.51	25.62	43.87
CB0712B_gl	76.61	0.068	13.21	0.47	0.037	0.07	0.5	4.53	4.51	0.002	100			5.87066	31.8773	26.6372	38.3111	2.38939	0	0	0	0	0.0698521	0.0597168	0	0	0	0.0314053	0.129074	0.500394	0	0	0	0	0	0	0	0	0		96.83	32.92	27.51	39.57	100		30.77	24.21	45.02
CB0712B_gl	76.59	0.075	13.17	0.44	0.042	0.09	0.52	4.5	4.58		100			5.48426	31.7753	27.0516	38.0587	2.20835	0	0	0	0	0.225519	0	0.0335347	0	0	0.0763778	0.142366	0.436071	0	0	0	0	0	0	0	0	0		96.89	32.8	27.92	39.28	100		30.82	24.77	44.41
CB0712B_gl	76.65	0.075	13.2	0.5	0.044	0.07	0.52	4.48	4.46		100			6.37142	32.3281	26.3432	37.89	2.57841	0	0	0	0.0570742	0	0.109529	0	0	0	0.0111315	0.142368	0.547726	0	0	0	0	0	0	0	0	0		96.56	33.48	27.28	39.24	100		31.12	23.78	45.1
CB0712B_gl	76.61	0.085	13.13	0.5	0.043	0.09	0.52	4.48	4.55		100			5.67019	32.0074	26.8723	37.8866	2.27738	0	0	0	0	0.230871	0	0.0017597	0	0	0.04741	0.161335	0.522655	0	0	0	0	0	0	0	0	0		96.77	33.08	27.77	39.15	100		31.02	24.55	44.44
CB0712B_gl	76.45	0.077	13.3	0.48	0.04	0.1	0.5	4.51	4.54		100			6.10305	31.6979	26.8168	38.1454	2.47935	0	0	0	0.0574963	0	0.0995762	0	0	0	0.103214	0.14617	0.462023	0	0	0	0	0	0	0	0	0		96.66	32.79	27.74	39.46	100		30.57	24.27	45.16
CB0705_gl	76.81	0.072	13.43	0.46	0.042	0.09	0.51	3.99	4.6		100			6.97134	34.8255	27.1699	33.7456	2.52881	0	0	0	0.959309	0	0.10455	0	0	0	0.0850677	0.136672	0.452297	0	0	0	0	0	0	0	0	0		95.74	36.37	28.38	35.25	100		33.83	24.75	41.41
CB0705_gl	76.41	0.07	13.39	0.46	0.043	0.09	0.52	4.28	4.73	0.007	100			6.64935	32.2208	27.9389	36.1998	2.5785	0	0	0	0.283731	0	0.107043	0	0	0	0.0908642	0.132881	0.44832	0	0	0	0	0	0	0	0	0		96.36	33.44	28.99	37.57	100		31.07	25.22	43.71
CB0705_gl	76.54	0.076	13.37	0.51	0.044	0.1	0.55	4.03	4.78	0.01	100			7.40851	33.542	28.2298	34.08	2.72684	0	0	0	0.566102	0	0.109516	0	0	0	0.106093	0.144248	0.49327	0	0	0	0	0	0	0	0	0		95.85	34.99	29.45	35.55	100		32.36	25.42	42.22
CB0705_gl	76.25	0.087	13.34	0.48	0.047	0.1	0.51	4.53	4.63	0.018	100			5.87139	31.0625	27.3498	38.3165	2.39004	0	0	0	0	0.0167183	0.109257	0	0	0	0.0742519	0.165162	0.482025	0	0.0416848	0	0	0	0	0	0	0		96.73	32.11	28.27	39.61	100		30.02	24.8	45.18
CB0705_gl	76.64	0.067	13.29	0.47	0.048	0.12	0.53	4.2	4.63	0.004	100			6.88861	33.2694	27.3482	35.5231	2.62809	0	0	0	0.405332	0	0.11949	0	0	0	0.197428	0.127186	0.38593	0	0	0	0	0	0	0	0	0		96.14	34.6	28.45	36.95	100		32.1	24.71	43.19
CB0705_gl	77.29	0.084	12.94	0.43	0.05	0.11	0.53	4.07	4.5	0.002	100			7.09303	35.1684	26.5796	34.4227	2.62802	0	0	0	0.40989	0	0.124466	0	0	0	0.115559	0.159453	0.39795	0	0	0	0	0	0	0	0	0		96.17	36.57	27.64	35.79	100		33.92	24.15	41.94
10gl	76.69	0.073	13.26	0.48	0.064	0.09	0.52	4.27	4.54	0.006	100			6.66388	33.2559	26.8179	36.1169	2.57863	0	0	0	0.375806	0	0.159328	0	0	0	0.0821785	0.138582	0.476552	0	0	0	0	0	0	0	0	0		96.19	34.57	27.88	37.55	100		32.12	24.28	43.6
CB0710_gl	76.77	0.075	13.29	0.44	0.036	0.13	0.51	4.21	4.55		100			6.6312	33.7051	26.8733	35.6046	2.52869	0	0	0	0.511736	0	0.08961	0	0	0	0.206862	0.14236	0.346056	0	0	0	0	0	0	0	0	0		96.18	35.04	27.94	37.02	100		32.6	24.41	42.99
CB0710_gl	77.2	0.073	13.21	0.49	0.039	0.08	0.52	3.97	4.42	0.003	100			7.13154	36.0016	26.1056	33.575	2.57829	0	0	0	0.948824	0	0.0970779	0	0	0	0.0495457	0.138564	0.510097	0	0	0	0	0	0	0	0	0		95.68	37.63	27.28	35.09	100		34.94	23.82	41.24
CB0710_gl	76.94	0.064	13.32	0.55	0.048	0.05	0.51	3.91	4.61	0.008	100			7.10384	35.3677	27.2246	33.0637	2.52841	0	0	0	0.969928	0	0.119467	0	0	0	0	0.106884	0.610842	0	0	0	0	0	0.0076781	0	0	0		95.66	36.97	28.46	34.57	100		34.39	24.84	40.77
CB0710_gl	75.94	0.077	13.82	0.46	0.051	0.08	0.52	4.66	4.36	0.023	100			5.80352	31.0127	25.7557	39.4173	2.42853	0	0	0	0.544062	0	0.12697	0	0	0	0.037967	0.146182	0.484849	0	0.0532656	0	0	0	0	0	0	0		96.19	32.24	26.78	40.98	100		30.11	23.32	46.57
CB0710_gl	76.89	0.079	13.21	0.48	0.041	0.11	0.53	4	4.66		100			7.20821	34.5771	27.5248	33.8308	2.62803	0	0	0	0.621751	0	0.102063	0	0	0	0.130042	0.149962	0.443504	0	0	0	0	0	0	0	0	0		95.93	36.04	28.69	35.27	100		33.43	24.96	41.61
CB0710_gl	76.73	0.084	13.25	0.5	0.047	0.08	0.52	4.37	4.39	0.019	100			6.22709	33.3675	25.932	36.963	2.45457	0	0	0	0.409133	0	0.117008	0	0	0	0.0176887	0.159466	0.543253	0	0.0440005	0	0	0	0	0	0	0		96.26	34.66	26.94	38.4	100		32.33	23.6	44.07
CB0710_gl	76.63	0.061	13.17	0.45	0.04	0.1	0.52	4.51	4.51	0.011	100			5.85021	32.0097	26.6392	38.1447	2.37021	0	0	0	0	0.106208	0.0503371	0	0	0	0.149557	0.115795	0.396726	0	0.0254723	0	0	0	0	0	0	0		96.79	33.07	27.52	39.41	100		30.93	24.24	44.83
CB0710_gl	76.49	0.067	13.28	0.46	0.037	0.07	0.49	4.55	4.54	0.012	100			5.75828	31.566	26.8177	38.4849	2.35148	0	0	0	0.0186258	0	0.0921109	0	0	0	0.0343057	0.127191	0.487348	0	0.0277893	0	0	0	0	0	0	0		96.87	32.59	27.68	39.73	100		30.49	24.39	45.11
CB0710_gl	76.39	0.081	13.47	0.47	0.047	0.07	0.61	4.41	4.46	0.005	100			7.50118	32.2745	26.3404	37.294	3.02435	0	0	0	0.278444	0	0.116985	0	0	0	0	0.149647	0.522023	0	0	0	0	0	0.0021554	0	0	0		95.91	33.65	27.46	38.88	100		30.86	23.34	45.81
CB0710_gl	76.75	0.072	13.37	0.45	0.046	0.07	0.51	4.14	4.6		100			6.73577	33.8865	27.1691	35.0132	2.52874	0	0	0	0.6527	0	0.114504	0	0	0	0.0198203	0.136668	0.486176	0	0	0	0	0	0	0	0	0		96.07	35.27	28.28	36.45	100		32.82	24.69	42.5
CB0710_gl	76.66	0.064	13.03	0.54	0.047	0.07	0.51	4.49	4.56	0.022	100			4.83766	32.0751	26.9342	37.9752	1.9305	0	0	0	0	0.252373	0	0.0544864	0	0	0.0429932	0.121489	0.570192	0	0.0509441	0	0	0	0	0	0	0		96.98	33.07	27.77	39.16	100		31.33	24.96	43.71
CB0710_gl	76.42	0.061	13.05	0.5	0.049	0.09	0.55	4.66	4.61	0.007	100			2.65446	30.7637	27.2297	39.4132	1.07474	0	0	0	0	0.263114	0	0.548852	0	0	0.116931	0.115795	0.474767	0	0	0	0	0	0	0	0	0		97.41	31.58	27.95	40.46	100		30.67	26.08	43.25
CB0710_gl	76.69	0.079	13.07	0.46	0.049	0.12	0.51	4.29	4.73	0.006	100			6.28915	32.4739	27.9378	36.2829	2.43503	0	0	0	0	0.073004	0.0881308	0	0	0	0.162663	0.14996	0.39878	0	0	0	0	0	0	0	0	0		96.69	33.58	28.89	37.52	100		31.34	25.38	43.28
CB0710_gl	76.5	0.078	13.32	0.52	0.071	0.14	0.51	4.47	4.4		100			6.26967	32.443	25.9856	37.8008	2.52852	0	0	0	0.276494	0	0.176719	0	0	0	0.230779	0.148044	0.41838	0	0	0	0	0	0	0	0	0		96.23	33.71	27	39.28	100		31.38	23.52	45.1
CB0710_gl	76.74	0.076	13.24	0.4	0.047	0.1	0.56	4.13	4.69	0.011	100			7.1873	33.5194	27.7061	34.9355	2.70536	0	0	0	0.377399	0	0.117016	0	0	0	0.106123	0.144289	0.371201	0	0.0254758	0	0	0	0	0	0	0		96.16	34.86	28.81	36.33	100		32.26	24.97	42.77
CB0710_gl	76.53	0.079	13.23	0.46	0.042	0.08	0.48	4.56	4.52	0.008	100			5.5817	31.6284	26.7014	38.5722	2.28026	0	0	0	0	0.0779615	0.0684232	0	0	0	0.032174	0.149982	0.488854	0	0	0	0	0	0	0	0	0		96.9	32.64	27.56	39.81	100		30.61	24.37	45.03
CB0710_gl	77.15	0.073	13.01	0.46	0.376	0.09	0.53	3.71	4.59		100			7.72811	36.2965	27.1149	31.3822	2.62838	0	0	0	0.97453	0	0.936112	0	0	0	0.0821836	0.138591	0.454363	0	0	0	0	0	0	0	0	0		94.79	38.29	28.6	33.11	100		35.5	24.71	39.79
CB07-03_gl	76.32	0.144	13.13	0.2	0.065	0.02	0.76	3.99	5.34	0.022	100			5.97374	31.3303	31.554	33.7598	2.14485	0	0	0	0	0.349166	0	0.254682	0	0	0	0.0427785	0.222253	0.298053	0.0509644	0	0	0	0	0	0	0		96.64	32.42	32.65	34.93	100		30.5	28.94	40.56
CB07-03_gl	76.23	0.132	13.44	0.16	0.013	0.01	0.68	3.98	5.33	0.019	100			8.34249	31.2975	31.4953	33.6757	3.06509	0	0	0	0	0	0.0323748	0	0	0	0	0.0213896	0.177805	0.129673	0.0440154	0	0	0	0.0678812	0	0	0		96.47	32.44	32.65	34.91	100		29.69	27.76	42.55
CB07-03_gl	76.59	0.154	13.07	0.17	0.02	0.03	0.68	3.9	5.36	0.017	100			6.58481	32.1549	31.6732	32.9994	2.32612	0	0	0	0	0.107439	0	0.158474	0	0	0	0.0641699	0.188922	0.294963	0.0393829	0	0	0	0	0	0	0		96.83	33.21	32.71	34.08	100		31.07	28.88	40.04
CB07-03_gl	76.39	0.149	13.46	0.17	0.016	0.02	0.69	3.92	5.17	0.018	100			9.06209	32.347	30.5468	33.1646	3.3049	0	0	0	0.203824	0	0.0398418	0	0	0	0	0.0427748	0.188899	0	0.0416946	0	0	0	0.126447	0	0	0		96.06	33.67	31.8	34.53	100		30.59	26.75	42.66
CB07-03_gl	76.01	0.143	13.46	0.16	0.014	0.02	0.68	4.15	5.36	0.013	100			6.06716	30.1312	31.6675	35.1085	2.26767	0	0	0	0	0.0751941	0	0.210488	0	0	0	0.0427723	0.177777	0.295556	0.030111	0	0	0	0	0	0	0		96.91	31.09	32.68	36.23	100		29.15	28.8	42.04
2Agl	76.73	0.105	13.11	0.55	0.059	0.03	0.71	2.87	5.83	0.004	100			12.6666	36.0969	34.4335	24.2722	3.52036	0	0	0	0.786906	0	0.146862	0	0	0	0	0.0641383	0.610916	0	0	0	0	0	0.0711688	0	0	0		94.8	38.08	36.32	25.6	100		34.29	30.32	35.39
CB072A_gl	76.81	0.108	12.88	0.62	0.05	0.05	0.69	3.12	5.68		100			11.4776	35.3472	33.5416	26.3818	3.42059	0	0	0	0.344559	0	0.124437	0	0	0	0	0.106878	0.688546	0	0	0	0	0	0.0516443	0	0	0		95.27	37.1	35.21	27.69	100		33.53	29.57	36.9
CB072A_gl	76.63	0.11	13.01	0.55	0.058	0.03	0.66	3.2	5.74		100			10.7875	34.5347	33.9054	27.0658	3.27278	0	0	0	0.332656	0	0.144387	0	0	0	0	0.0641447	0.610977	0	0	0	0	0	0.0761735	0	0	0		95.51	36.16	35.5	28.34	100		32.84	29.97	37.2
CB072A_gl	76.8	0.091	12.92	0.61	0.063	0.01	0.72	2.53	6.24		100			14.2988	36.5505	36.8578	21.3983	3.57021	0	0	0	0.694381	0	0.15683	0	0	0	0	0.021381	0.677611	0	0	0	0	0	0.0796963	0	0	0		94.81	38.55	38.88	22.57	100		34.63	32.46	32.91
CB072A_gl	76.2	0.13	13.32	0.5	0.065	0.03	0.75	3.18	5.82	0.007	100			12.1476	33.7091	34.375	26.8943	3.71875	0	0	0	0.42525	0	0.1618	0	0	0	0	0.0641393	0.555387	0	0	0	0	0	0.0961558	0	0	0		94.98	35.49	36.19	28.32	100		31.78	29.74	38.48
2Bgl	76.94	0.093	12.86	0.61	0.06	0.06	0.69	2.67	6.01	0.001	100			13.1575	36.8214	35.4957	22.5801	3.42111	0	0	0	0.707484	0	0.149347	0	0	0	0	0.128273	0.677543	0	0	0	0	0	0.0254047	0	0	0		94.9	38.8	37.4	23.79	100		35.03	31.47	33.5
CB072B_gl	77.18	0.083	12.68	0.61	0.057	0.05	0.68	2.73	5.92	0.008	100			12.7424	37.0811	34.9628	23.0866	3.37139	0	0	0	0.544457	0	0.141874	0	0	0	0	0.10689	0.677516	0	0	0	0	0	0.0266662	0	0	0		95.13	38.98	36.75	24.27	100		35.25	31.08	33.66
CB072B_gl	76.88	0.091	12.92	0.6	0.064	0.06	0.7	2.53	6.14	0.001	100			13.9571	37.054	36.2668	21.3981	3.471	0	0	0	0.838899	0	0.159318	0	0	0	0	0.128285	0.666496	0	0	0	0	0	0.0234081	0	0	0		94.72	39.12	38.29	22.59	100		35.26	32.12	32.62
CB072B_gl	76.81	0.081	13.08	0.59	0.059	0.05	0.68	2.71	5.96		100			12.8244	36.6643	35.1921	22.913	3.37073	0	0	0	0.933618	0	0.146823	0	0	0	0	0.106869	0.655173	0	0	0	0	0	0.0246626	0	0	0		94.77	38.69	37.13	24.18	100		34.99	31.24	33.77
CB072B_gl	76.67	0.104	12.75	0.61	0.059	0.06	0.71	2.86	6.19		100			12.7052	34.7105	36.5519	24.1824	3.5196	0	0	0	0.0541261	0	0.14683	0	0	0	0	0.128249	0.677414	0	0	0	0	0	0.0363911	0	0	0		95.44	36.37	38.3	25.34	100		32.75	32.01	35.24
CB072B_gl	76.91	0.1	12.77	0.59	0.059	0.05	0.68	2.59	6.24	0.001	100			13.3393	36.4019	36.8564	21.9049	3.37174	0	0	0	0.518475	0	0.146867	0	0	0	0	0.106901	0.655369	0	0	0	0	0	0.0436597	0	0	0		95.16	38.25	38.73	23.02	100		34.59	32.68	32.73
CB0711_gl	76.38	0.14	13.27	0.8	0.104	0.06	0.77	3.05	5.42	0.01	100			12.8928	36.0612	32.0012	25.7858	3.81657	0	0	0	0.985026	0	0.258788	0	0	0	0	0.128233	0.888304	0	0	0	0	0	0.0723537	0	0	0		93.85	38.43	34.1	27.48	100		34.29	27.86	37.85
CB0711_gl	76.75	0.133	13.04	0.8	0.103	0.03	0.79	2.95	5.4	0.005	100			13.5698	37.0483	31.884	24.9411	3.91582	0	0	0	0.904921	0	0.256307	0	0	0	0	0.0641185	0.888331	0	0	0	0	0	0.099122	0	0	0		93.87	39.47	33.96	26.57	100		35.1	27.77	37.13
CB0711_gl	76.82	0.127	12.58	0.8	0.092	0.08	0.77	3.45	5.28	0.018	100			10.0048	34.8742	31.1705	29.1637	3.24216	0	0	0	0	0.255403	0.110495	0	0	0	0	0.170955	0.888189	0.0904398	0.0416595	0	0	0	0	0	0	0		95.21	36.63	32.74	30.63	100		33.31	27.62	39.07

## Sheet: Table S8 Kd's
	Cs	Rb	Ba	K	Th	U	Nb	Ta	La	Ce	Pb	Pr	Sr	Nd	Zr	Hf	Sm	Eu	Tb	Dy	Y	Yb	Lu
plagioclase	0.07	0.02	0.5	0.226	0.01	0.01	0.01	0.01	0.3	0.2	0.4	0.18	6	0.15	0.01	0.01	0.1	2.5	0.08	0.07	0.07	0.07	0.07
alkali feldspar	0.052	0.2	7	1.34	0.03	0.055	0.03275	0.047	0.138	0.06	0.8	0.048	11.8	0.035	0.03	0.036	0.02	4.75	0.024	0.024	0.05	0.02	0.016
quartz	0.005	0.005	0.005	0.005	0.005	0.005	0.005	0.005	0.005	0.005	0.005	0.005	0.005	0.005	0.005	0.005	0.005	0.005	0.005	0.005	0.005	0.005	0.005
clinopyroxene	0.009	0.01	0.01		0.01	0.01	0.009	0.009	0.2	0.5	0.03	1	0.25	2	0.2	0.2	4	4.8	5.5	5	4.8	3.8	3.6
orthopyroxene	0.005	0.005	0.005	0.0366	0.005	0.005	0.005	0.005	0.01	0.01	0.009	0.015	0.008	0.02	0.03	0.03	0.04	0.06	0.09	0.18	0.4	0.7	0.65
amphibole	0.01	0.02	0.4	0.1	0.01	0.01	1	1	0.5	0.9	0.08	1.5	2	2	0.65	0.64	4	4.8	5	4.8	4	3.3	2.5
biotite	0.7	1.5	8	1.37	0.005	0.005	1.7	1.7	0.01	0.01	0.17	0.01	0.6	0.01	0.05	0.05	0.01	0.15	0.015	0.02	0.03	0.04	0.05
FeTi oxides	0.005	0.05	0.005		0.08	0.08	1.2	1.4	0.22	0.2	0.1	0.17	0.01	0.15	0.8	0.75	0.11	0.13	0.08	0.09	0.09	0.09	0.1
apatite	0.7	1.5	0.2		1	1	1.7	0.2	46.2	65.7	0.2	70	2	101.5	0.6	0.7	130	155	110	76.2	162	40	20
zircon	0.005	0.05	0.005		41.84	192.05	1.08	2	0.24	0.54	0.1	0.5	0.01	0.68	3224.17	1589.76	3.42	2.42	33.69	64.89	106.45	385.75	0.1
allanite		0.19			500	17	1.7		2594.5	2278.5			1.8	1620	0.29	19	866.5	111	273	137	95.5	30.5	33
titanite		0.015	9.08	0.395	9.08	3.65	61	76	75	160	0.143	288	0.904	438	8.66	16	733	551	727	655	344	183	126
Kd's Sources
Mainly from GERM (Mainly averages of high and low from Mahood and Hildreth, 1983)							https://earthref.org/cgi-bin/kdd-s1-advanced.cgi?database_name=kdd&search_start=advanced&term=K&term_type=element&conjunction=OR
Padilla, A. J., & Gualda, G. A. R. (2016). Crystal-melt elemental partitioning in silicic magmatic systems: An example from the Peach Spring Tuff high-silica rhyolite, Southwest USA. Chemical Geology, 440, 326–344. http://doi.org/10.1016/j.chemgeo.2016.07.004
M Streck pers. communication

## Sheet: Table S9 Bulk D's
Table S7 Rayleigh Fractionation models of internal variations within the CBVC rhyolite suite.
Best fit for CBV12A to DOMO01															Best fit Bulk Ds for Path 1 CPPI to matrix glass					Best fit Bulk Ds for Path 1a CPPI to 2A,B glass
D's and P's from CBRhyolite.PC.txt																		F=0.65					F=0.45
30pl 45san 10qz 5hb 5bt 0.2feti 0.07ap 0.09zr 0.085all 0.07titan															13pl 41san 36qz 0.1feti 0.1ap 0.01zr 0.03all 0.01titan					13pl25san36qz20hb4bt1feti0.2ap0.2zr0.06all0.2titan
CS	0.027														CS	0.013				CS	0.016
RB	0.174														RB	0.088				RB	0.122
BA	5.977														BA	4.988				BA	5.11
K	1.042		This works with both												K	0.851				K	0.607
TH	0.488		Chondrite normalized Sun, 1980												TH	0.172				TH	0.417
U	0.114		REE Chrondrite-normalized Sun and McDonough, 1989												U	0.022				U	0.227
NB	0.202														NB	0.026				NB	0.42
TA	0.218														TA	0.032				TA	0.453
LA	2.469														LA	0.93				LA	1.977
CE	2.229														CE	0.818				CE	2.045
PB	0.494														PB	0.382				PB	0.278
PR	0.403														PR	0.744				PR	2.256
SR	5.084														SR	3.654				SR	4.338
ND	1.917														ND	0.667				ND	2.484
ZR	2.962														ZR	0.34				ZR	6.618
HF	1.514														HF	0.186				HF	3.374
SM	1.584														SM	0.487				SM	3.074
EU	3.726														EU	1.502				EU	3.389
TB	1.134														TB	0.29				TB	2.925
DY	0.96														DY	0.21				DY	2.653
Y	0.777														Y	0.267				Y	2.108
YB	0.727														YB	0.125				YB	1.914
LU	0.287														LU	0.06				LU	0.83
																Figure 13 in the main text.
